# A protective role of SRC-1 against aging associated cognitive decline

Hesong Liu<sup>1,\*</sup>, Yongjie Yang<sup>1,\*</sup>, Jonathan C. Bean<sup>1,\*</sup>, Yang He<sup>1</sup>, Hailan Liu<sup>1</sup>, Rambabu Majji<sup>2</sup>, Chen Liang<sup>1</sup>, Nan Zhang<sup>1</sup>, Meng Yu<sup>1</sup>, Longlong Tu<sup>1</sup>, Qingzhuo Liu<sup>1</sup>, Yue Deng<sup>1</sup>, Kristine M. Conde<sup>1</sup>, Na Yin<sup>1</sup>, Mengjie Wang<sup>1</sup>, Yongxiang Li<sup>1</sup>, Junying Han<sup>1</sup>, Sanika Vattakuzhiyil Jossy<sup>1</sup>, Megan Elyse Burt<sup>1</sup>, Hari Krishna Yalamanchili<sup>1,2</sup>, Chunmei Wang<sup>1</sup>

<sup>1</sup>USDA/ARS Children's Nutrition Research Center, Department of Pediatrics, Baylor College of Medicine, One Baylor Plaza, Houston, TX 77030, USA

<sup>2</sup>Jan and Dan Duncan Neurological Research Institute, Texas Children's Hospital, Houston, TX 77030, USA

\*Equal contribution

**Correspondence to:** Hari Krishna Yalamanchili, Chunmei Wang; email: [hari.yalamanchili@bcm.edu](mailto:hari.yalamanchili@bcm.edu), [chunmeiw@bcm.edu](mailto:chunmeiw@bcm.edu)

**Keywords:** aging, dementia, SRC-1, S100A6

**Received:** October 14, 2024

**Accepted:** July 21, 2025

**Published:** August 27, 2025

**Copyright:** © 2025 Liu et al. This is an open access article distributed under the terms of the [Creative Commons Attribution License](https://creativecommons.org/licenses/by/4.0/) (CC BY 4.0), which permits unrestricted use, distribution, and reproduction in any medium, provided the original author and source are credited.

## ABSTRACT

**Introduction:** Research indicates a strong correlation between obesity and the risk of dementia, both are linked to steroid receptor coactivator-1 (SRC-1), a transcriptional coactivator.

**Methods:** We used RNA sequencing analysis (RNA-Seq) to investigate the transcriptome of SRC-1-KO mice, and identified S100 calcium-binding protein A6 (S100A6), an AD associated gene, as one target of SRC-1. We tested cognitive behaviors in SRC-1-KO mice and mice with a humanized SRC-1 mutation (SRC-1<sup>L1376P</sup>), and performed promoter luciferase assays on S100A6.

**Results:** Loss of SRC-1 caused alterations in gene signatures that are commonly associated with neurodegenerative diseases, including AD, and diminished the neural plasticity of the hippocampal CA1 neurons. Both SRC-1-KO and SRC-1<sup>L1376P</sup> mice displayed early signs of contextual memory impairment at 6 months of age. Mechanistically, SRC-1 significantly promoted the expression S100A6.

**Conclusion:** We identified a protective role of SRC1 against aging associated cognitive decline, potentially by promoting the expression of S100A6.

## INTRODUCTION

About 36% of the elderly population (at an age of 70–75) experience mild memory loss, and about 32% are affected by Alzheimer's disease (AD) [1]. Owing to the aging of populations worldwide, dementia is reaching epidemic proportions, with a large human, social and economic burden. AD is the most common cause of severe memory loss in the elderly. Despite the tremendous efforts in the field of cognitive regulation, the pathophysiology underlying memory decline is not fully understood, and effective treatments are limited.

Research indicates a strong correlation between obesity and an increased risk of dementia and Alzheimer's

disease [2–6]. The brain is rich in various nuclear receptors and transcription factors that play a crucial role in maintaining metabolic equilibrium and cognitive functions. Notably, thyroid hormone receptor [7], glucocorticoid receptor [8], estrogen receptor [9], peroxisome proliferator-activated receptor gamma [10], signal transducer and activator of transcription-3 [11], and Forkhead Box O1 [12], etc. are among those implicated in both metabolic and Alzheimer's diseases progression. These nuclear receptors and transcription factors depend on coactivators like steroid receptor coactivator-1, 2 and 3 (SRC-1, 2 and 3) [13] for their transcriptional activities. SRC proteins are prevalent in the brain, especially in areas like the hippocampus and hypothalamus [14, 15]. Studies have shown that the

deletion of SRC-1 (encoded by *Ncoa1*) gene globally or from the hypothalamus in mice leads to obesity [16, 17]. A particular gene variant, SRC-1<sup>L1376P</sup> mutation, has been linked to early-onset obesity in children (body mass index standard deviation score (BMI SDS) >3.5; age of onset <10 years), and has been confirmed to induce obesity in mice as well [17, 18]. Despite that loss of SRC-1 does not accelerate the development of AD [19], another study showed that RNAi-mediated knockdown of SRC-1 in the hippocampal CA1 impairs memory [20, 21]. Thus, the dysfunction of SRC-1 is linked to both obesity and memory loss. However, it is unclear whether and how SRC-1 contributes to the aging associated dementia.

Earlier studies have indicated a reduction in SRC-1 expression in the brains of middle-aged individuals [22]. In this study, we confirmed the age associated decline of SRC-1 and further explored the differences in brain gene expression profiles between wild type C57BL/6 (WT) and SRC-1-KO mice. We performed cognitive behavioral tests on WT mice, SRC-1-KO mice and mice with the humanized SRC-1<sup>L1376P</sup> mutation across various age stages to assess the role of SRC-1 in cognitive functions. Finally, we identified the stimulatory effect of SRC-1 on the expression of S100A6 and S100A11, which are genes potentially associated with AD and memory deficits.

## METHODS

### Mice

Care of all animals and procedures were approved by the Institutional Animal Care and Use Committee of Baylor College of Medicine (AN-5479 and AN-6098). Mice, including SRC-1-KO mice [16] and SRC-1<sup>L1376P</sup> mutant mice [17], were housed in a temperature-controlled room at 22–24°C using a 12-h light, 12-h dark cycle. All these mice were fed with regular chow (5V5R, PicoLab). Food and water were provided ad libitum.

### RNA-Seq and analysis

Total hypothalamic RNA was isolated from SRC-1-KO mice and littermates at the age of 20 weeks using the RNeasy Lipid Tissue Mini Kit (Qiagen). Three RNA samples for each group were sent to Genomic and RNA Profiling Core (GARP) at Baylor College of Medicine for sequencing. One hundred-fifty base pair paired end reads were aligned to Genome Reference Consortium Mouse Build 39 reference genome (*Mus musculus* genome assembly GRCm39 NCBI. [https://www.ncbi.nlm.nih.gov/data-hub/assembly/GCF\\_000001635.27/](https://www.ncbi.nlm.nih.gov/data-hub/assembly/GCF_000001635.27/)) using STAR 2.7.9a using option “--

outSAMtype BAM SortedByCoordinate” [23]. Output from STAR was then quantified using “featureCounts” function from Subread v2.0.3 using default options [24].

Differential expression was calculated using DESeq2 1.36.0 with test set to “Wald” [25] with R 4.2.2 within RStudio 2022.07.2 Build 576. Differential expression results were filtered for genes that were 1.5-fold either up or down with an adjusted *p*-value <0.05 using dplyr 1.0.10. These genes were used to produce two list of genes that were then used to create molecular function gene ontology utilizing “gost” function from gprofiler2 0.2.1 with options “organism = ‘mmusculus’, ordered\_query = FALSE, evcodes = TRUE, correction\_method = ‘gSCS’, domain\_scope = ‘annotated’, exclude\_ica = TRUE, sources = ‘GO:MF’”.

An additional enrichment analysis was conducted using Gene Set Enrichment Analysis (GSEA, version 4.3.2) [26] with the “preranked” option. Genes were first rank ordered using the algorithm log<sub>2</sub>(fold change) X - log<sub>10</sub> (adjusted *p*-value). Options on GSEA were set to: gene set database “c2.cp.kegg.v2022.1.Hs.symbols.gmt”, chip platform Mouse\_Gene\_Symbol\_Remapping\_Human\_Orthologs\_MsigDB.v2022.1.Hs.chip”, enrichment statistic “classic” and number of permutations “100,000”. Other options were left on default settings. RNA-Seq results were visualized using ggplot2.

Alternative splicing was detected using rMATS turbo (v4.1.24) [27], in Python 2.7.18. Genes splicing events were considered significant if the absolute inclusion level difference was greater than 0.2 and adjusted *p*-value was less than 0.05.

### Secondary analysis of published scRNA-Seq data

Data were obtained from GSE152506 [28]. Raw counts were first normalized using the log<sub>2</sub> counts per 10,000 formula. Data from either hypothalamus or hippocampus were subset then compared across age using FindMarkers feature of Seurat 5.1.0, Wilcox test followed by Bonferroni correction for multiple comparisons [29]. Data were plotted using VlnPlot feature of Seurat with boxplots superimposed on top.

### Secondary analysis of published bulk RNA-Seq data

Gene expression data for both human and mouse brain tissues were obtained from publicly available sources. Human bulk tissue RNA-seq data were downloaded from the GTEx portal ([https://www.gtexportal.org/home/downloads/adult-gtex/bulk\\_tissue\\_expression/](https://www.gtexportal.org/home/downloads/adult-gtex/bulk_tissue_expression/)),

including brain regions such as the Cerebellum, Cortex, Frontal Cortex, Hippocampus, and Hypothalamus. Corresponding sample metadata, including donor age information, were also downloaded from GTEx and used to stratify samples into two age groups: 20–40 years (combining 20–29 and 30–39 years) and 60–80 years (combining 60–69 and 70–79 years). Differential gene expression (DEG) analysis was performed using DESeq2 [25] on normalized count data. Log-transformed expression values were visualized with violin plots, with age groups on the x-axis and expression on the y-axis. Statistical significance was denoted by asterisks (\* for  $p < 0.05$ , \*\* for  $p < 0.01$ ). For mouse data, hippocampal gene expression profiles were obtained from the GEO dataset GSE179698, which includes RNA-seq samples from 6- and 18-month-old mice. Expression values for Nco1, S100a6, and S100a11 were extracted from the dataset, and log-transformed values were visualized using box-and-whisker plots.

### Electrophysiology

Mice (males, 6 weeks of age) were perfused and brain slices were prepared for electrophysiology recording as we did before. Briefly, pyramidal neurons in CA1, identified based on their location and morphology, were visualized and recorded. Whole-cell recordings were performed on CA1 pyramidal neurons. Evoked EPSCs (eEPSCs) and EPSC based LTP were recorded as we did before [30].

### Immunofluorescence

WT mice (males, 10 weeks of age) were perfused and brains were sectioned and processed for immunohistochemistry staining for SRC-1 and three cell markers. Briefly, brain sections were blocked (3% Normal donkey serum) for 1 h, incubated with Rabbit anti-SRC-1 (#2191, Cell Signaling Technology) on shaker at 4°C for overnight, followed by 3 washes with 1X PBS and then the incubation of the donkey anti-rabbit AlexaFluor 488 (A21206, Invitrogen) for 2 h. After three washes, each series of brain sections were then incubated with one of the cell marker antibodies respectively. Cell marker antibodies include Mouse anti-NeuN (ab104224, Abcam) as neuron marker, Chicken anti-GFAP (ab4674, Abcam) as astrocyte marker and Goat anti-Iba1 (ab5076, Abcam) as microglial cell marker. All the brain sections were then incubated with the donkey anti-mouse/chicken/goat AlexaFluor 594 (A21203/A11042/A11058, Invitrogen) for 2 h. After the last wash and dry, slides were cover-slipped, and images of the hippocampus were captured using a fluorescence microscope.

### Behavioral tests

The Novel Object Recognition (NOR) test was conducted over two consecutive days to assess memory in mice using a modified protocol [31]. On the first day, each mouse was acclimated to the testing room for 30 minutes, followed by a 20-minute habituation period in an empty Open Field (OF) box (40.64 cm × 40.64 cm). Subsequently, two identical objects were placed in opposite corners of the OF box. The mouse was then allowed to explore the arena and the objects freely for 15 minutes with an overhead camera to record its behavior for subsequent analysis. After the 15 minutes session, the mouse was returned to its home cage, and the OF box and objects were thoroughly cleaned with soap and water to eliminate olfactory cues. On the second day, following a 30-minute acclimatization to the testing room, the mouse was then reintroduced to the same OF box. One of the familiar objects was replaced with a novel object that differed in both shape and color. The mouse was again allowed to explore the arena for 15 minutes, during which behavior was recorded. After the session, the mouse was returned to its home cage, and the testing apparatus was cleaned as described above. The Discrimination Index was calculated as the time interacted with the novel object divided by the total time that the mouse interacted with both objects. The water maze test (RAWM) and fear conditioning test were performed as we did previously [30].

### Q-PCR validation of gene expression in the hypothalamus and hippocampus

To examine gene expression, C57BL/6 control and SRC-1-KO mice (male, 4 months of age) were sacrificed, and the hypothalamus and hippocampus were quickly collected. Total RNA was isolated using TRIzol Reagent (Invitrogen) and 2 µg of total RNA was reverse-transcribed to cDNA using a High-Capacity cDNA Reverse Transcription Kits (Invitrogen). Q-PCR was performed on a CFX384 Real-Time System (Bio-Rad) using SsoADV SYBR Green Supermix (Bio-Rad). Primer sequences for S100a6: forward 5'-GAAGGTGACAAGCACACCCT-3' and reverse: 5'-CCCAGGAAGGCGACATACTC-3'; for S100a11: forward 5'-AAGTACAGCGGAAGGATGGA-3' and reverse 5'-ATGCGGTCAAGGACACCAG-3'; for Cyclophilin: forward 5'-TGGAGAGCACCAAGACA GACA-3' and reverse 5'-TGCCGGAGTCGACAA TGAT-3'. The expressions of S100a6 and S100a11 were normalized to the house-keeping gene Cyclophilin.

### Western blot

Hypothalamus and hippocampus from young (4 months of age) and aged (13 months of age) were collected and

lysed with lysis buffer: 50 mM Tris, 50 mM KCL, 10 mM EDTA, 1% NP-40, supplied with protease inhibitor cocktail (Roche). Total protein tissue lysate (20 ug) from each mouse was loaded for SDS-PAGE and then detected with SRC-1 (128E7) Rabbit mAb (#2191, Cell signaling, at 1:2000) and HRP-linked anti-rabbit IgG Antibody (at 1:10000, Cell signaling).

### Luciferase assay

Neuro 2A (mouse neuroblastoma cell line) and immortalized SRC-1-KO MEF cells [17] were cultured in Dulbecco's modified Eagle's medium supplemented with 10% fetal bovine serum (Atlanta), 100 IU/ml penicillin and 100 ng/ml streptomycin. Luciferase reporter plasmid for S100a6 (1.66K, -1744 to -81, with primer pairs: forward 5'-AAAGGCCGTGAGAGCTAGGA-3' and reverse 5'-TGAGGCAGTCAGTCTCAAGC-3') and S100a11 (1.2K, -1292 to -76, with primer pairs: forward 5'-AGCTGAAATTCCAAGGCCA-3' and reverse 5'-TCCCCATGTCGGTGCTCTA-3'), were cloned as previous described [17].

Luciferase assay using Neuro 2A cells was performed to test if the promoters of S100a6 and S100a11 can be regulated by these transcription factors, including AP2 (gift from Robert Tjian, Addgene plasmid # 12100), Sp1 (gift from Guntram Suske, Addgene plasmid # 24543), TCF1 (gift from Kai Ge, Addgene plasmid # 40620), KLF4 (gift from Derrick Rossi, Addgene plasmid # 26815) and PU.1 (Gift from Qiang Tong) [32]. Neuro 2A cells were transfected with 800 ng of the luciferase reporter plasmid combined with 200 ng of indicated transcription factor plasmid or the control empty plasmid using the Lipofectamine LTX (Invitrogen). Cells were lysed 40 hours post-transfection, and the luciferase activity was measured using the Luciferase<sup>®</sup> Reporter Assay System (Promega).

To test if SRC-1 enhances the expression of S100a6 and S100a11, SRC-1-KO MEF cells were transfected with 700 ng of the luciferase reporter plasmid combined with 200 ng of indicated transcription factor plasmid and 100 ng of pCR3.1-SRC-1 or the control empty plasmid.

## RESULTS

### SRC-1 is associated with neurodegenerative diseases

SRC-1 has been implicated to regulate both metabolic balance and cognitive functions. Importantly, the expression of SRC-1 is significantly declined with aging [22]. To explore the potential contribution of SRC-1 to aging associated diseases, including metabolic dysregulations and dementia, we performed RNA-Seq

analyses using samples obtained from the hypothalamus of SRC-1-KO mice and C57BL/6 control mice (Figure 1A), and the data has been uploaded to GEO (GSE278158). As a validation, SRC-1 (coded by Ncoa1) was significantly depleted in the KO mice (Supplementary Figure 1A). Consistent with the protective role of SRC-1 in metabolic regulation, Pomc, Lepr and downstream Stat3 were significantly decreased in SRC-1-KO mice (Supplementary Figure 1B–1D). This is consistent with our previous study showing decreased leptin sensitivity in mice with deletion of SRC-1 selectively from POMC neurons, a population of hypothalamic neurons essential for metabolic regulation [17].

Applying a threshold of 1.5-fold difference and a corrected *p*-value <0.05, there were 396 genes down regulated and 103 genes up regulated in SRC-1-KO mice (Figure 1B and Supplementary data 1). We used these genes to perform Gene Set enrichment Analysis (GSEA) and Gene ontology (GO) analysis. The enrichment analysis for molecular functions revealed dysfunction in extracellular matrix binding, as well as intracellular cytoskeletal binding gene profiles. Interestingly, S100 protein binding was the most significant downregulated term, and the structure constituent of myelin sheath was the most significant upregulated term (Figure 1C). Importantly, S100 proteins and myelin functions are both implicated in the pathology of AD [33–37]. In particular, SRC-1-KO mice express significantly lower S100A6 and S100A11 (Figure 1D, 1E), and both genes have been demonstrated neuroprotective effects in neurodegenerative diseases [35, 38–47].

Further, Kyoto encyclopedia of genes and genomes (KEGG) analysis revealed that gene sets related to neurodegenerative disorders, including Alzheimer's, were enriched, while the gene set for spliceosome was downregulated in SRC-1-KO mice (Figure 1F). Utilizing multivariate analysis of transcript splicing with an absolute inclusion level difference >0.2 and FDR <0.05, we found there were 343 significant splicing events (Supplementary Figure 1E) corroborating an altered spliceosome activity. Importantly, recent studies suggest that dysregulation of spliceosome also increases the risk of AD [48–50]. Although these splicing events are not directly involved in AD, GO analysis showed that they are involved in neuron projection organization (Supplementary Figure 1E), which is essential for normal neuron functions.

Together, the changes of gene profiles in SRC-1-KO mice suggest higher risks of neurodegenerative diseases including AD.



## SRC-1 regulates neural plasticity of the hippocampal CA1 neurons

It has been reported that siRNA-mediated knockdown of SRC-1 in the hippocampal CA1 impairs memory in mice, associated with decreased CA1 synapse density, postsynaptic density thickness, and long-term potentiation (LTP) [20]. This finding led us to focus on the hippocampal CA1 region. Here we found that both neurons (marked by NeuN) and astrocytes (marked by GFAP) in the hippocampal CA1 abundantly expressed

SRC-1, while microglial cells (marked by Iba) did not (Figure 2).

We further explored neural plasticity in the hippocampal CA1 neurons. To this end, we used a high-frequency field stimulation (HFS) protocol to induce long-term potentiation (LTP) of evoked excitatory postsynaptic current (EPSC) in CA1 neurons from WT mice, as indicated by a sustained increase of EPSC after the HFS stimulation. However, in SRC-1-KO mice, LTP was significantly blunted (Figure 3). These results

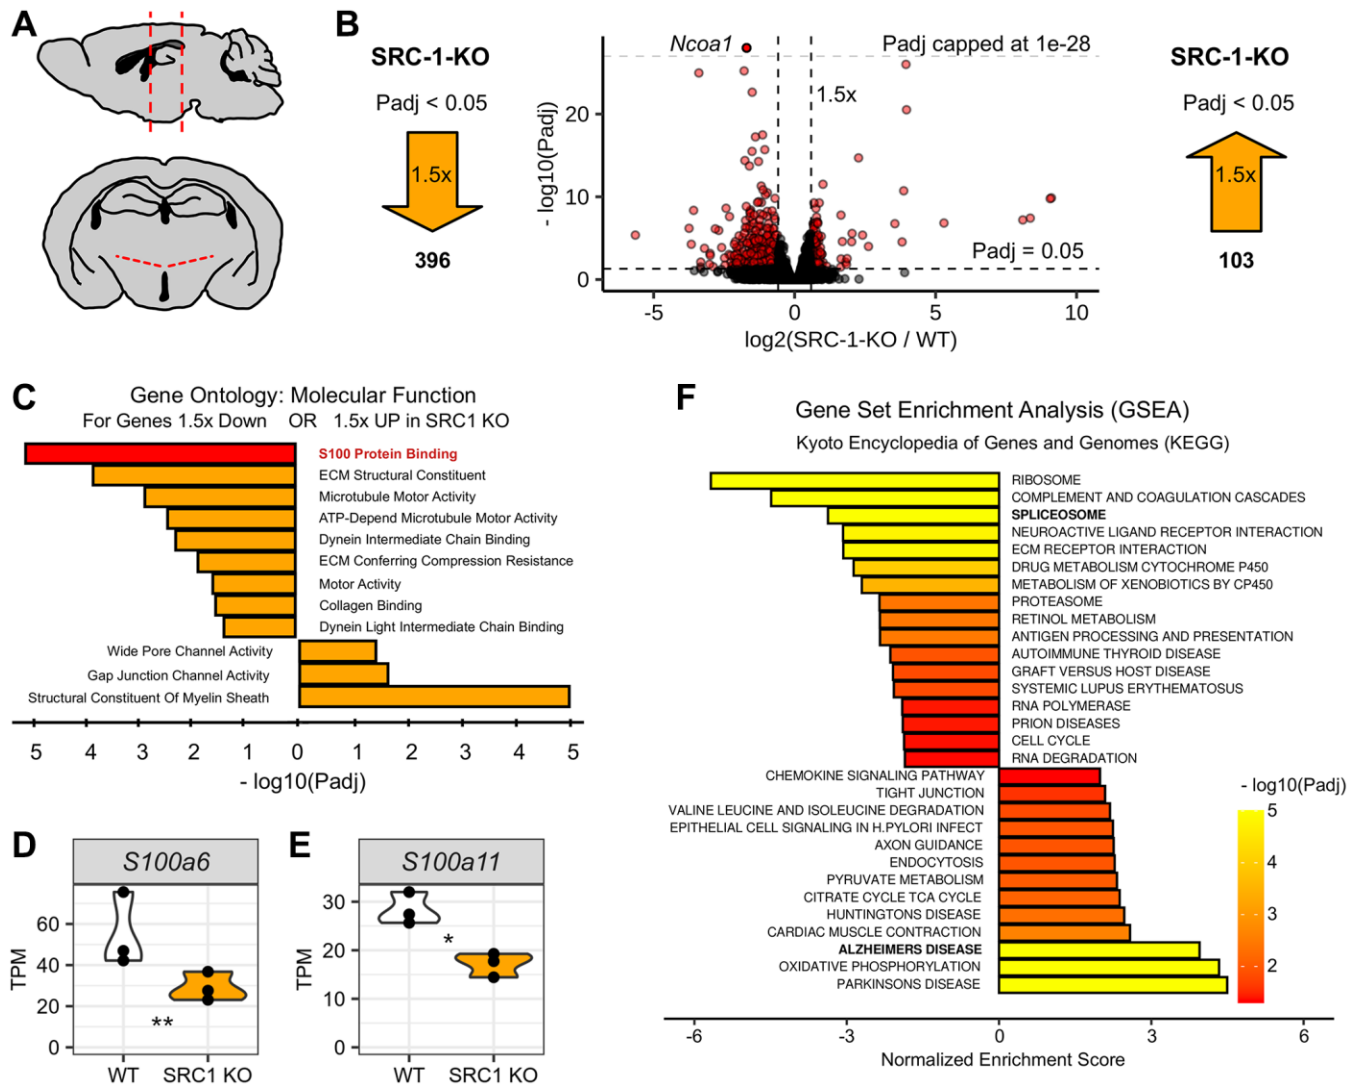

**Figure 1. Differential gene expression in the hypothalamus of SRC-1-KO mice.** (A) Diagram depicting mouse brain in sagittal view (top) and coronal view (bottom) with red dotted lines indicating hypothalamic region collected for RNA-seq experiment. (B) Volcano plot of RNA-seq results (center) with  $\log_2$  fold change plotted on the x-axis and  $-\log_{10}$  corrected  $p$ -value ( $P_{adj}$ ) plotted on the y-axis. Horizontal dashed line indicates  $P_{adj} = 0.05$ . Two vertical lines indicate 1.5-fold either up or down. Each dot represents one gene. Genes plotted in red represent genes that are both 1.5-fold different with a  $P_{adj} < 0.05$ . Light grey dashed horizontal line marks  $P_{adj} = 1e-28$  and indicates genes plotted above this line are out of the scale of the panel. Large orange arrows mark the number of genes that are 1.5-fold lower (left) or higher (right) with a  $P_{adj} < 0.05$ . (C) Gene ontology for molecular function using genes 1.5-fold down with  $P_{adj} < 0.05$  (top) or 1.5-fold up with  $P_{adj} < 0.05$  (bottom). (D, E) Violin plots for *S100a6* (D) and *S100a11* (D) normalized to transcripts per million (TPM). \* and \*\*,  $P_{adj} < 0.05$  or 0.01. (F) Gene set enrichment analysis using Kyoto encyclopedia of genes and genomes (KEGG) as output with a rank ordered gene list, using  $\log_2$  fold change  $\times -\log_{10}$   $P_{adj}$  as the algorithm to rank genes, as input.

predict a protective role of hippocampal SRC-1 in cognitive functions.

### SRC-1 prevents aging-associated memory loss

To fully evaluate the function of SRC-1, we compared the cognitive behaviors among mice with either global

deletion of SRC-1 (SRC-1-KO) or knock-in of a humanized loss-of-function point mutation (SRC-1<sup>L1376P</sup>) [17]. Similar to human, mice displayed an aging associated cognition decline. The contextual memory of WT mice was significantly decreased after 18 months of age (Figure 4A, 4B), as indicated by the decrease of freezing behavior in the contextual fear conditioning

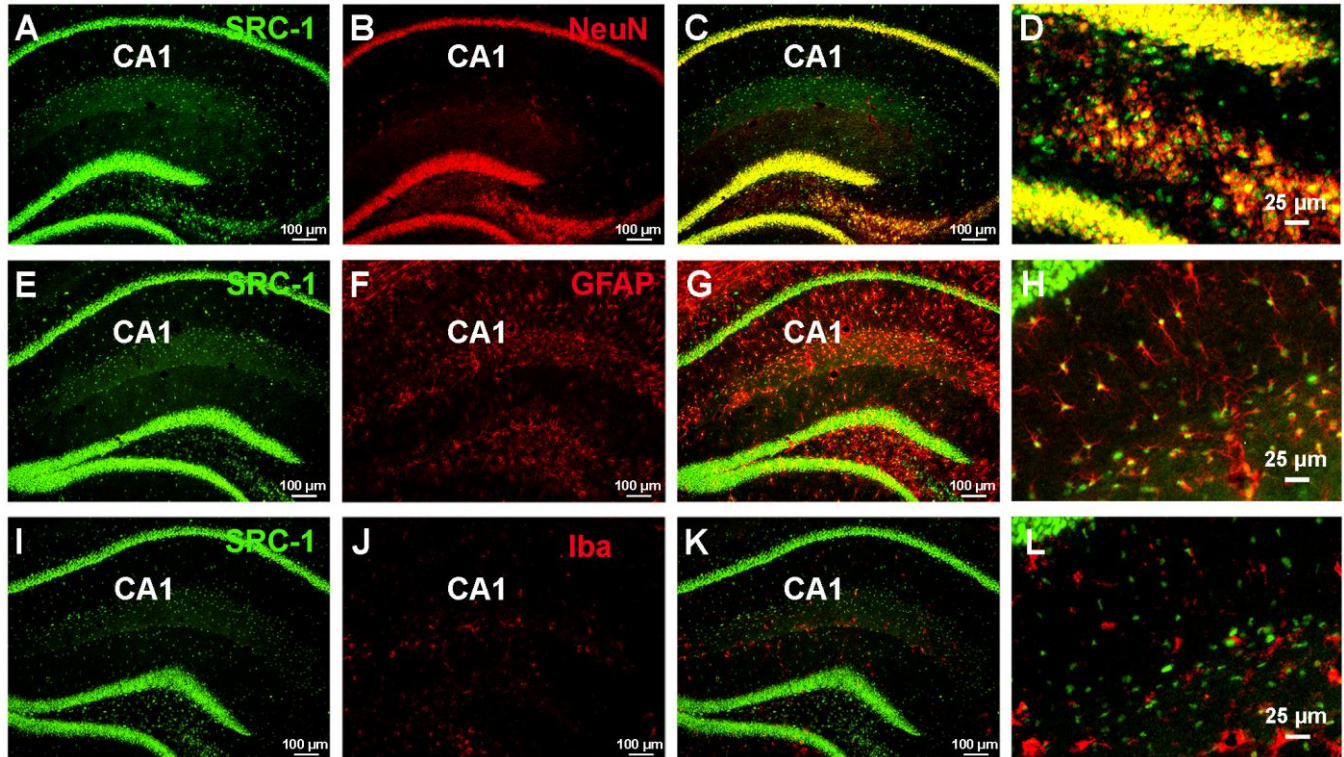

**Figure 2. The expression of SRC-1 in the hippocampus.** (A–C) Co-staining of SRC-1 (green, A) and a neuron marker (NeuN, red, B), and merge (C) in the hippocampal CA1 region. (D) is high magnification indicating co-expression of SRC-1 in NeuN labeled neurons. (E–G) Co-staining of SRC-1 (green, E) and an astrocyte marker (GFAP, red, F), and merge (G) in the hippocampal CA1 region. (H) is high magnification indicating co-expression of SRC-1 in GFAP labeled astrocytes. (I–K) Co-staining of SRC-1 (green, I) and a microglial marker (Iba, red, J), and merge (K) in the hippocampal CA1 region. (L) is high magnification indicating no double-labelling.

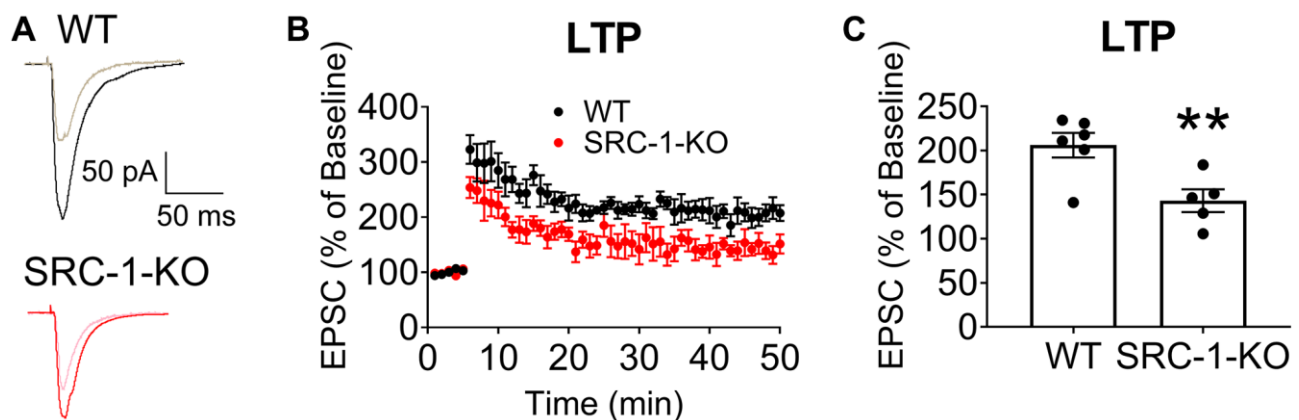

**Figure 3. Impaired LTP in hippocampal CA1 neurons of SRC-1-KO mice.** (A) Typical EPSC traces before (lighter curve) and after (darker curve) LTP induction in CA1 neurons from WT or SRC-1-KO mice. (B) Magnitude of EPSC elevations before (0–5 min) and after LTP induction (5–50 min). (C) Averaged EPSC elevations during 45–50 min in (B).  $N = 5-6$  neurons from 3 mice.  $**P < 0.01$  in unpaired two-tailed  $t$ -tests.

test. However, this reduction did not happen in SRC-1-KO mice and SRC-1<sup>L1376P</sup> mice, because their contextual memory had already been significantly impaired as early as 6 months of age compared to WT mice (Figure 4C and Supplementary Figure 2A, 2B). Consistently, the survival rate dropped with aging in all mice, and it was significantly lower in SRC-1-KO mice and displayed a non-significant decrease trend in SRC-1<sup>L1376P</sup> mice, compared to WT control mice (Figure 4D). These results together supported an early-aging phenotypes caused by SRC-1 deficiency.

In the novel object recognition (NOR) test, SRC-1-KO mice and SRC-1<sup>L1376P</sup> mice displayed significant decreased discrimination score between novel object and old object at 18 months of age, indicating impaired cognition (Figure 4E, 4F). However, both SRC-1-KO mice and SRC-1<sup>L1376P</sup> mice displayed similar performance to WT mice in the Radial Arm Water Maze test

(RAWM), despite a non-significant trend of impaired spatial memory (Supplementary Figure 2C, 2D).

### SRC-1 expression during aging

We demonstrated a protective role of SRC1 against aging associated cognitive decline, and we further explored the molecular mechanisms. We reanalyzed human public data libraries (GTEx portal) and demonstrated an age associated decline of SRC-1 expression in different brain regions, including the hippocampus, hypothalamus and cerebellum, and a non-significant decrease trend in the cortex (Figure 5A–5D). We reanalyzed published spatial RNA-Seq data to compare gene profiles between young (3 months) and old (18 months) mice brains [28]. Interestingly, we found that the expression of SRC-1 was significantly decreased in both the hypothalamus and hippocampus of aged mice compared to young mice

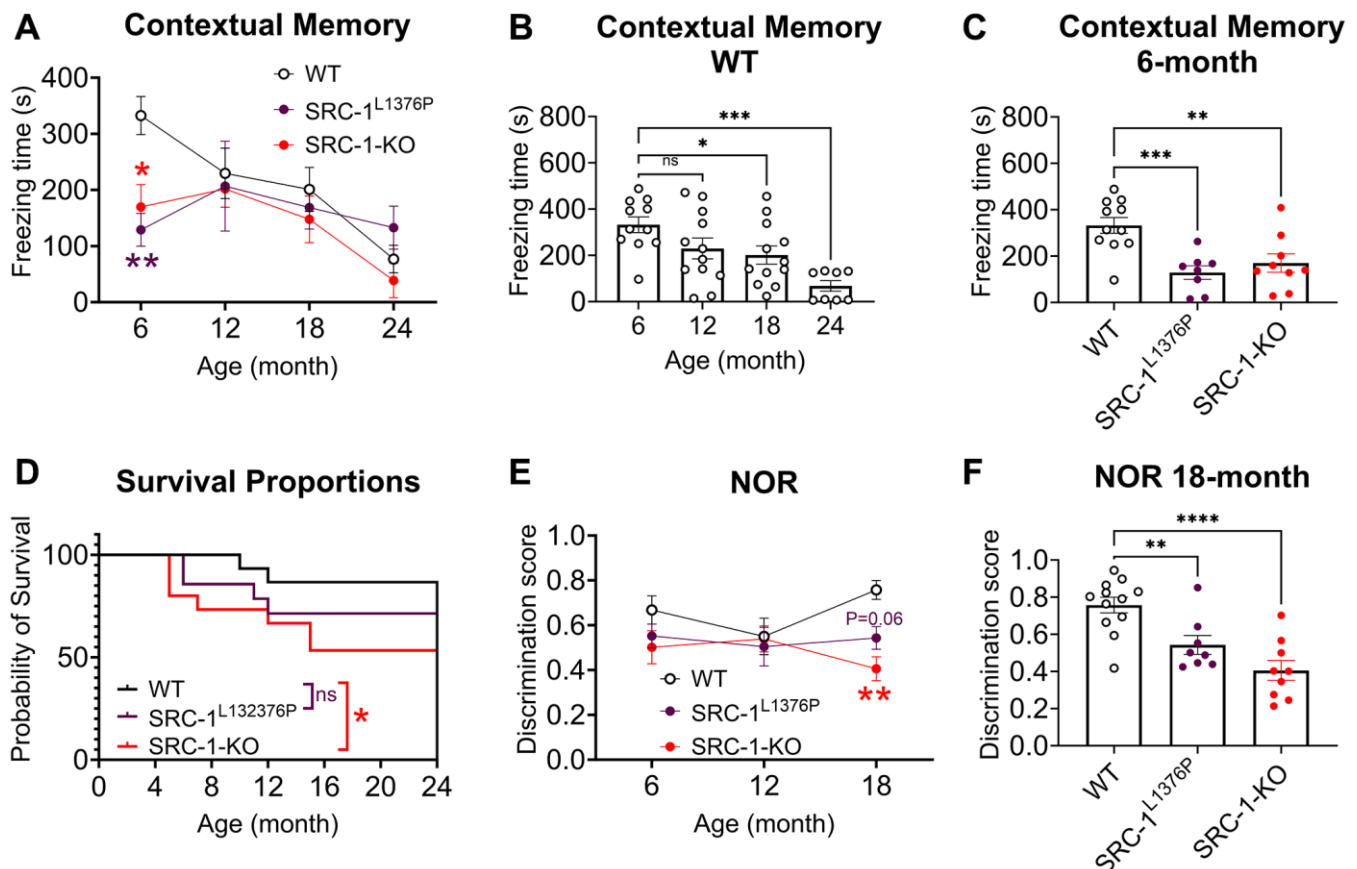

**Figure 4. Impaired cognitive functions of SRC-1-KO mice and SRC-1<sup>L1376P</sup> mice at different ages.** (A–C) Freezing time in the fear conditioning test in all mice at different ages (A), in WT mice at different ages (B), and in all groups of mice at 6 months of age (C).  $N = 8–12$  mice/group. Data are presented as mean  $\pm$  SEM and/or with individual data points. \* $P < 0.05$ ; \*\* $P < 0.01$ ; \*\*\* $P < 0.001$  in two-way ANOVA analyses followed by Tukey's multiple comparisons test (A) or one way ANOVA analysis followed by Dunnett's multiple comparisons test (B, C). (D) The surviving curve of WT mice, SRC-1-KO mice and SRC-1<sup>L1376P</sup> mice. \* $P < 0.05$  in Logrank test for trend test. (E, F) Discrimination score is defined as the ratio of time spent with the novel object during test vs. (training + test) in the novel object test in WT, SRC-1<sup>L1376P</sup> and SRC-1-KO mice at different ages (E) and at 18 months of age (F).  $N = 8–12$  mice/group. Data are presented as mean  $\pm$  SEM with individual data points. \*\* $P < 0.01$ ; \*\*\*\* $P < 0.0001$  in two-way ANOVA analyses followed by Tukey's multiple comparisons test (E) or one way ANOVA analysis followed by Dunnett's multiple comparisons test (F).



(Supplementary Figure 3A, 3B). S100A6 displayed a non-significant decrease trend in the hippocampus and a significant decrease in the cerebellum of aged human samples, as well as a significant decrease in the

hypothalamus of aged mouse samples (Figure 5E–5H and Supplementary Figure 3D, 3E). S100A11 displayed no changes or opposite changes (Figure 5I–5L and Supplementary Figure 3G, 3H). Further, secondary

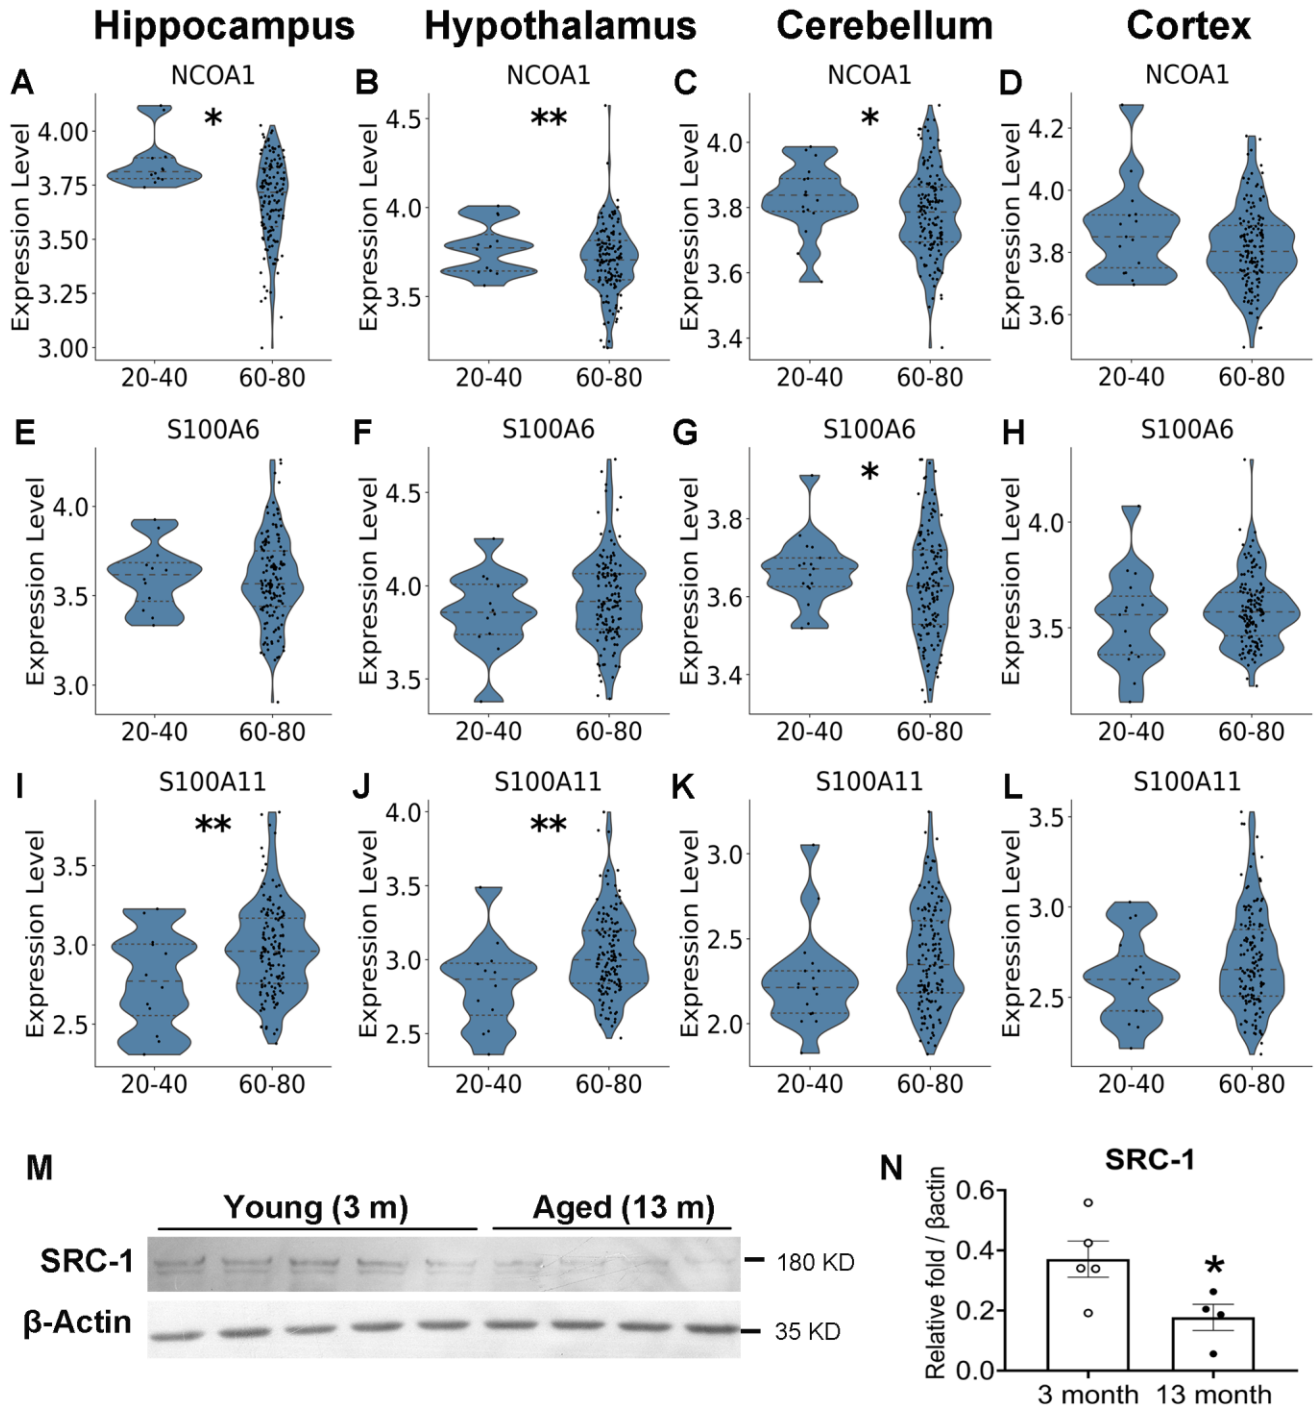

**Figure 5. Aging-associated changes in the expression of SRC-1, S100A6 and S100A11 in human.** Secondary analysis of published RNA-Seq data revealed the differential gene expression between young (20–40 years of age) and old (60–80 years of age) human. (A–D) The expression of SRC-1 coding gene NCOA1, (E–H) S100A6 coding gene and (I–L) S100A11 coding gene in the hippocampus, hypothalamus, cerebellum and cortex of young vs aged human brains, respectively. \* and \*\* $P < 0.05$  or  $0.01$  in Wald test from DESeq2 with Benjamini-Hochberg correction for multiple comparisons. (M, N) Western Blot detection (M) and quantification (N) of SRC-1 protein levels compared to housekeeping protein  $\beta$ -actin in the hippocampus of young (3 months of age) and aged mice (13 months of age).  $N = 4$ –5 mice. \* $P < 0.05$  in unpaired two-tailed  $t$ -tests.



analysis of public bulk RNA-Seq data of mice (GSE179698) revealed a decrease trend of both SRC-1 and S100A6 but not S100A11 in the hippocampus of 18-month aged mice compared to 6-month young mice (Supplementary Figure 3C, 3F, 3I). To further confirm the age-associated decline of SRC-1 in mice, we detected the expression of SRC-1 protein using western blot. As expected, SRC-1 protein was significantly lower in the hippocampus of 13-month aged mice than that of 4-month young mice (Figure 5M, 5N).

Meanwhile, similar to reduced synaptic proteins by acute knockdown of SRC-1 in the hippocampus, the expression of Synaptophysin, GluR1 and PSD-95 [20] was also decreased in both the hippocampus and the hypothalamus of aged mice, suggesting aging associated decline of synaptic functions (Supplementary Figure 4A–4H). However, these synaptic proteins were not changed by SRC-1 deletion (Supplementary Figure 4I–4L). Based on the non-association between the expression of SRC-1 and synaptic proteins with chronic loss of SRC-1, the early-aging cognitive decline in SRC-1-KO mice should be contributed by other molecular mechanisms than these synaptic proteins.

Together, S100A6 and SRC-1 displayed synchronously decrease in both SRC-1-KO mice and aging mice, implying S100A6 as a potential downstream target gene of SRC-1.

### **SRC-1 stimulates S100A6 expression**

RNA-Seq data identified that S100A6 and S100A11 were downregulated by SRC-1 deficiency in the hypothalamus. We validated the decreased expression of these two gene in the hypothalamus (Figure 6A and Supplementary Figure 5A). The hippocampus is the major center of cognition, and hippocampus CA1 neurons contribute to both NOR [51, 52] and contextual fear [53, 54]. Based on the high expression of SRC-1 in the cognition center, hippocampus CA1 neurons, we further determined whether SRC-1 regulates S100A6 and S100A11 in the hippocampus, too. S100A6 was significantly decreased (Figure 6B), and S100A11 displayed a decrease trend (Supplementary Figure 5B), in the hippocampus of SRC-1-KO mice. These results suggest S100A6 and S100A11 as two potential downstream targets of SRC-1, a co-factor for transcription factors.

To investigate how SRC-1 regulates the expression of S100A6 and S100A11, we analyzed their promoters. Using the online tool PROMO ([http://alggen.lsi.upc.es/cgi-in/promo\\_v3/promo/promoinit.cgi?dirDB=TF\\_8.3](http://alggen.lsi.upc.es/cgi-in/promo_v3/promo/promoinit.cgi?dirDB=TF_8.3)), we screened the promoter regions of S100a6 and

S100a11 to identify potential transcription factors that may mediate the effects of SRC-1. These findings were further validated using JASPAR transcription factor binding profile database (<https://jaspar.genereg.net/>). We found several binding sites of five transcription factors, including Sp1, AP2, TCF1, KLF4 and PU.1, on S100a6 and S100a11 gene promoters (Figure 6C and Supplementary Figure 5C). These transcription factors may regulate the processes of AD [55–60]. To confirm their transcriptional activity, we used a Neuro 2A, a mouse neuroblastoma cell line, to perform luciferase assay using the promoters of S100A6 and S100A11. We found that the activity of S100A6 promoter was increased 5 folds by KLF and to a less extend by AP2, while the activity of S100A11 promoter was modestly increased by AP2 and PU.1, but not TCF (Figure 6C and Supplementary Figure 5C).

To further determine whether SRC-1 can enhance the effect of these transcription factors, we performed luciferase assays using SRC-1-KO MEF cells. As expected, both KLF and AP2 significantly increased S100A6 promoter activity. Interestingly, in the background of SRC-1 deficiency, SRC-1 supplement alone did not change S100A6 promoter activity. However, SRC-1 supplement significantly augmented the stimulatory effects of both KLF and AP2 on S100A6 promoter activity (Figure 6D, 6E). Similarly, despite that S100A11 promoter activity was not increased by SRC-1 expression, SRC-1 significantly augmented the stimulatory effects of PU.1 and AP2 on S100A11 promoter activity (Supplementary Figure 5D, 5E). Together, these results support that the co-activator activity of SRC-1. Although SRC-1 does not regulate the transcription directly, it can enhance the transcriptional activity of AP2 and KLF to promote the expression of S100A6 and enhance the transcriptional activity of PU.1 and AP2 to promote the expression of S100A11.

## **DISCUSSION**

The RNA-Seq analysis of SRC-1-KO brains revealed a negative correlation between SRC-1 expression and neurodegenerative diseases. Consistent with this finding, we identified a protective role of SRC-1 against aging associated cognition decline. With the decline of SRC-1 during aging [22], WT mice displayed a gradual decline of contextual memory. However, SRC-1-KO mice and SRC-1<sup>L1376P</sup> mice displayed lower contextual memory throughout all the life span tested, suggesting an early-aging cognitive phenotype in SRC-1-KO mice and SRC-1<sup>L1376P</sup> mice.

SRC-1-KO mice and SRC-1<sup>L1376P</sup> mice displayed deficits in contextual memory as early as 6 months of

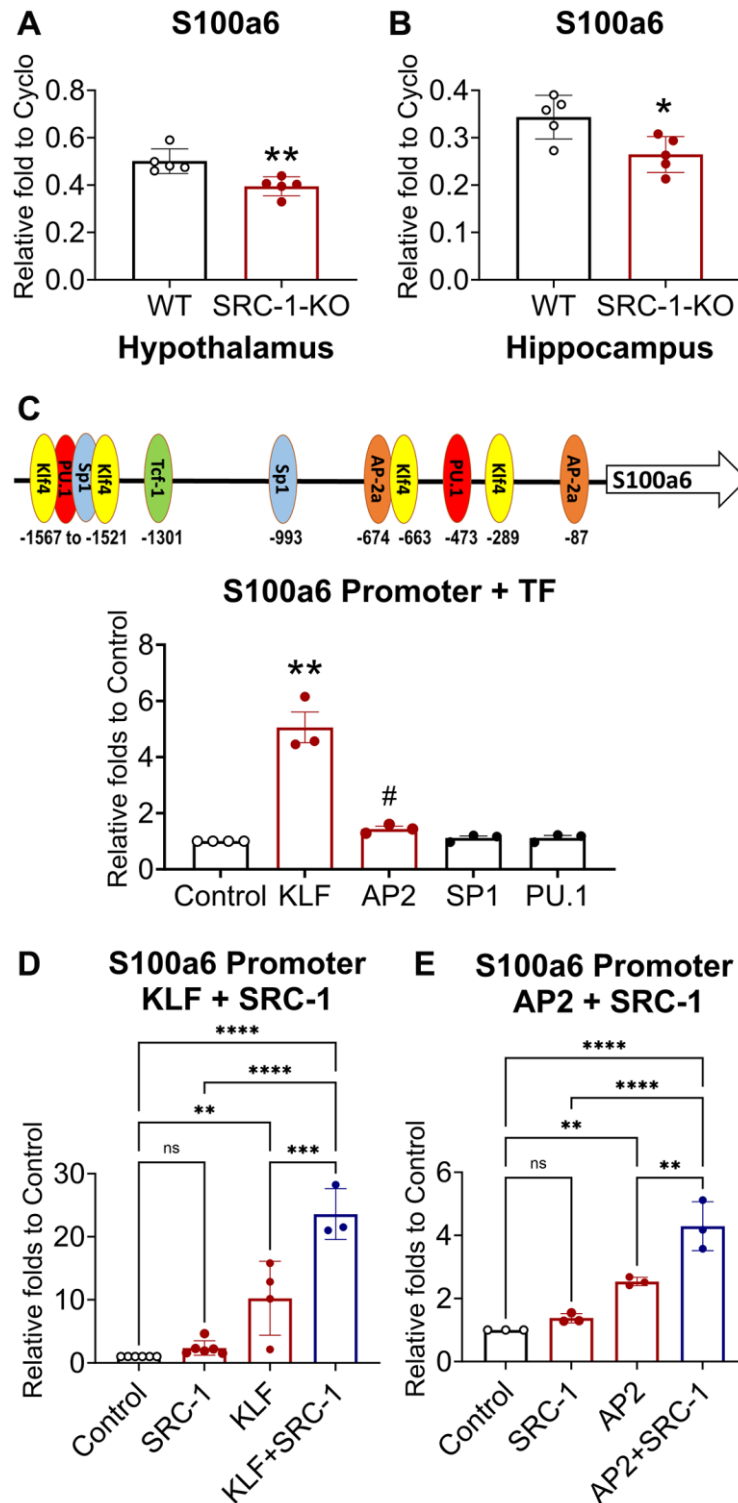

**Figure 6. The regulation of S100a6 by transcription factors and SRC-1.** (A, B) Relative mRNA levels of S100a6 mRNA measured in the hypothalamus (A) and the hippocampus (B) isolated from control vs. SRC-1-KO mice using Q-PCR. Data are presented as mean  $\pm$  SEM.  $N = 5$  samples per group.  $*P < 0.05$ ,  $**P < 0.01$  in unpaired two-tailed  $t$ -tests. (C) Binding sites of transcription factors on the promoter of S100a6 and the effect of indicated transcription factor on S100a6 promoter luciferase activity in Neuro 2A cells. Data are presented as mean  $\pm$  SEM.  $N = 3$ –4 repeated experiments with 3 biological replicates per group in each experiment.  $***P < 0.001$  in one-way ANOVA analyses followed by Sidak tests.  $\#P < 0.05$  in unpaired two-tailed  $t$ -tests against Control. (D, E) Effects of SRC-1 and transcription factors KLF (D) and AP2 (E) on S100a6 promoter luciferase activity in SRC-1-KO MEF cells. Data are presented as mean  $\pm$  SEM.  $N = 3$ –6 repeated experiments with 6 biological replicates per group in each experiment. Control group is normalized to 1 to allow comparisons among different batches of experiments.  $*P < 0.05$ ,  $**P < 0.01$  and  $***P < 0.001$  in two-way ANOVA analyses followed by Sidak tests.

age and persisted the whole life span. Consistently, contextual memory is impaired in some AD mouse models (e.g., Tg2576, 5XFAD and APP/PS1) at 4–6 months of age regardless how soon the A $\beta$  plaques are formed [61–63]. However, 3xTg-AD and AppNL-G-F-knock-in mouse models have intact contextual memory at 6 months of age [64, 65]. Interestingly, loss of SRC-1 does not accelerate the development of A $\beta$  plaques in APP/PS1 mice or change the expression of synaptic proteins [19]. These results argue that SRC-1 protects cognitive functions independent of A $\beta$  pathology.

Despite acute knockdown of SRC-1 in the hippocampus reduces mice's performance in the Morris water maze test by reducing the LTP machinery [20], our SRC-1-KO mice and SRC-1<sup>L1376P</sup> mice display intact spatial memory during all the tested time in the RAWM test. In addition, while several synaptic proteins are downregulated by acute knockdown of SRC-1 in the hippocampus [20, 21], we did not detect the downregulation of these genes in SRC-1-KO mice. It is plausible that these synaptic proteins, but not the mRNAs, are dynamically regulated during memory formation. Another possibility is that the impaired contextual memory in SRC-1-KO mice and SRC-1<sup>L1376P</sup> mice could be independent of the SRC-1 regulatory effects on the hippocampal synaptic proteins. It is also plausible that embryonic deletion or mutation of SRC-1 caused development changes or compensations which rescue the synaptic proteins encoding genes and/or the spatial memory deficits. Thus, SRC-1 may provide different extents of protection or play different roles in different types of memories through different mechanisms.

To explore the molecular mechanisms, RNA-Seq analysis identified S100 proteins as the most downregulated genes. S100 protein family comprised of at least 25 Ca<sup>2+</sup> or Zn<sup>2+</sup> binding proteins with low molecular weights. Seven S100 proteins that are present in the brain, including S100B, S100A1, S100A6, S100A7, S100A8, S100A9 and S100A12, have been implicated in regulating A $\beta$  levels and Tau phosphorylation [35]. We identified S100A6 and S100A11 as potential downstream target genes of SRC-1, which are associated with the cognition functions and AD pathology [35, 38–47]. We also identified the transcription factors that promote the expression of S100A6 and S100A11. Further, we confirmed that SRC-1 can enhance the excitatory effects of KLF and AP2 on S100A6 promoter, and the excitatory effects of PU.1 and AP2 on S100A11 promoter, supporting the co-activator role of SRC-1. Interestingly, the combination of SRC-1 and KLF displayed the most profound stimulation on S100A6 promoter. S100A6 binds Ca<sup>2+</sup> to regulate Ca<sup>2+</sup> homeostasis and Ca<sup>2+</sup>-

dependent signaling pathways, and Ca<sup>2+</sup> dysregulation is implicated in AD development [40, 41]. Consistently, S100A6 is one of the most significantly positively correlated proteins with the AD phenotype [42]. S100A6 is upregulated in AD patients and in AD mouse models [43–45]. Interestingly, most S100A6 proteins are in astrocytes that surround A $\beta$  plaques [43], and *in vitro* S100A6 treatment in mouse brain sections reduces A $\beta$  levels and plaque burden [46]. Importantly, S100A6 expression is tightly positively correlated with cognitive function recovery in a rat model of traumatic brain injury [66], implicating the regulatory role of S100A6 in cognition. However, it is unclear whether increased S100A6 causes or defense against these phenotypes.

Previous studies indicate that acute loss of SRC-1 impairs spatial memory associated with downregulation of hippocampal synaptic proteins encoding genes. Our results support that embryonic loss of SRC-1 impairs contextual memory associated with downregulation of S100A6 and S100A11, independent of the spatial memory or hippocampal synaptic proteins encoding genes. Our studies provide SRC-1 as an upstream regulatory mechanism of S100A6. The synchronous decrease of contextual memory and the downregulation of SRC-1 and S100A6 support a protective role of SRC-1 against aging-associated memory decline, potentially through transcriptional regulation of S100A6.

Aging is associated with both metabolic dysregulations and neurodegenerative diseases, and SRC-1 contributes to both obesity and aging associated dementia. Thus, it is plausible that the decrease of SRC-1 in aging animals contributes to both aging associated body weight gain and cognition loss. Importantly, SRC-1<sup>L1376P</sup> is a mutation identified from human patients with obesity, and SRC-1<sup>L1376P</sup> mice are humanized mutant mouse model, which recapitulate many phenotypes observed in human patients [17]. The SRC-1 coding gene has already been added to the genetic screening panel for obesity, and our study provides a strong rationale to add this gene to the screening panel for neurodegenerative diseases, like AD.

### Limitation

Our study was conducted only on male mice to avoid the estrous cycle effects. Behavior assays were performed after 6 months of age, which corresponds to middle age in mice. The memory deficits might be developed earlier in SRC-1-KO mice and SRC-1<sup>L1376P</sup> mice. We only explored the regulatory effects of SRC-1 on S100A6 and S100A11 as molecular mechanisms. Many other neurodegenerative diseases-associated molecular changes are worthwhile for future

explorations. We used a promoter luciferase assay to evaluate the enhancement effect of SRC-1 on transcription factors. More comprehensive assays, like protein-protein interaction assays, need to be performed to confirm the co-activator function of SRC-1.

## CONCLUSION

We identified a negative association between SRC-1 expression and neurodegenerative diseases, and then confirmed the protective effect of SRC-1 against aging associated cognition decline. We further identified the stimulatory effect of SRC-1 on the transcription of S100A6 and S100A11, a potential molecular mechanism.

## AUTHOR CONTRIBUTIONS

Hesong Liu performed all behavior experiments. Y.Y performed all molecular studies. J.B performed RNA-Seq analysis and spatial RNA-Seq secondary analysis. Y.H performed electrophysiology experiments. R.M performed bulk RNA-Seq secondary analysis. H.L (Hailan Liu) performed immunofluorescence experiments. C.L, N.Z, M.Y, L.T, Q.L, Y.D, K.C, N.Y, M.W, Y.L, J.H, S.J and M.B assisted in experiments and data collections. H.K.Y and C.W conceived, designed, and supervised the project. All the experiments were performed at Children's Nutrition Research Center, Department of Pediatrics, Baylor College of Medicine.

## CONFLICTS OF INTEREST

The authors declare no conflicts of interest related to this study.

## ETHICAL STATEMENT

Care of all animals and procedures were approved by the Institutional Animal Care and Use Committee of Baylor College of Medicine (AN-5479 and AN-6098). Human data are from publicly available GTEx data, and these datasets are de-identified and do not contain information that can be linked to individual donors, aligning with ethical guidelines that exempt such data from human subject's research regulations.

## FUNDING

Investigators involved in this work were supported by grants from the NIH R01 DK136627 to C.W., USDA/ARS under Cooperative Agreement No. 58-3092-5-008 and TCH-2023 Pediatric Pilot award to C.W, USDA/ARS under Cooperative Agreement No. 58-3092-0-001, USDA/ARS grant CRIS 3092-51000-

065-003S, the Research Vision at Texas Children's Hospital, and the Duncan NRI Zoghbi Scholar Award to H.K.Y. American Heart Association award 23POST1030352 to Hailan Liu.

## REFERENCES

1. Hebert LE, Weuve J, Scherr PA, Evans DA. Alzheimer disease in the United States (2010-2050) estimated using the 2010 census. *Neurology*. 2013; 80:1778–83. <https://doi.org/10.1212/WNL.0b013e31828726f5> PMID:[23390181](#)
2. Flores-Cordero JA, Pérez-Pérez A, Jiménez-Cortegana C, Alba G, Flores-Barragán A, Sánchez-Margalet V. Obesity as a Risk Factor for Dementia and Alzheimer's Disease: The Role of Leptin. *Int J Mol Sci*. 2022; 23:5202. <https://doi.org/10.3390/ijms23095202> PMID:[35563589](#)
3. Morys F, Potvin O, Zeighami Y, Vogel J, Lamontagne-Caron R, Duchesne S, Dagher A, and Alzheimer's Disease Neuroimaging Initiative. Obesity-Associated Neurodegeneration Pattern Mimics Alzheimer's Disease in an Observational Cohort Study. *J Alzheimers Dis*. 2023; 91:1059–71. <https://doi.org/10.3233/JAD-220535> PMID:[36565111](#)
4. Suzzi S, Croese T, Ravid A, Gold O, Clark AR, Medina S, Kitsberg D, Adam M, Vernon KA, Kohnert E, Shapira I, Malitsky S, Itkin M, et al. N-acetylneuraminic acid links immune exhaustion and accelerated memory deficit in diet-induced obese Alzheimer's disease mouse model. *Nat Commun*. 2023; 14:1293. <https://doi.org/10.1038/s41467-023-36759-8> PMID:[36894557](#)
5. Ly M, Yu GZ, Mian A, Cramer A, Meysami S, Merrill DA, Samara A, Eisenstein SA, Hershey T, Babulal GM, Lenze EJ, Morris JC, Benzinger TLS, Raji CA. Neuroinflammation: A Modifiable Pathway Linking Obesity, Alzheimer's disease, and Depression. *Am J Geriatr Psychiatry*. 2023; 31:853–66. <https://doi.org/10.1016/j.jagp.2023.06.001> PMID:[37365110](#)
6. Picone P, Di Carlo M, Nuzzo D. Obesity and Alzheimer's disease: Molecular bases. *Eur J Neurosci*. 2020; 52:3944–50. <https://doi.org/10.1111/ejn.14758> PMID:[32323378](#)
7. Wang Y, Fisahn A, Sinha I, Nguyen DP, Sterzenbach U, Lallemand F, Hadjab S. Hippocampal Transcriptome Profile of Persistent Memory Rescue in a Mouse Model of THRA1 Mutation-Mediated Resistance to Thyroid Hormone. *Sci Rep*. 2016; 6:18617.



<https://doi.org/10.1038/srep18617>  
PMID:26743578

8. Tertilt M, Skupio U, Barut J, Dubovyk V, Wawrzczak-Bargiela A, Soltys Z, Golda S, Kudla L, Wiktorowska L, Szklarczyk K, Korostynski M, Przewlocki R, Slezak M. Glucocorticoid receptor signaling in astrocytes is required for aversive memory formation. *Transl Psychiatry*. 2018; 8:255.  
<https://doi.org/10.1038/s41398-018-0300-x>  
PMID:30487639
9. Kim J, Frick KM. Distinct effects of estrogen receptor antagonism on object recognition and spatial memory consolidation in ovariectomized mice. *Psychoneuroendocrinology*. 2017; 85:110–4.  
<https://doi.org/10.1016/j.psyneuen.2017.08.013>  
PMID:28846921
10. Govindarajulu M, Pinky PD, Bloemer J, Ghanei N, Suppiramaniam V, Amin R. Signaling Mechanisms of Selective PPAR $\gamma$  Modulators in Alzheimer's Disease. *PPAR Res*. 2018; 2018:2010675.  
<https://doi.org/10.1155/2018/2010675>  
PMID:30420872
11. Reichenbach N, Delekate A, Plescher M, Schmitt F, Krauss S, Blank N, Halle A, Petzold GC. Inhibition of Stat3-mediated astrogliosis ameliorates pathology in an Alzheimer's disease model. *EMBO Mol Med*. 2019; 11:e9665.  
<https://doi.org/10.15252/emmm.201809665>  
PMID:30617153
12. Fu JB, Wang ZH, Ren YY. Forkhead Box O1-p21 Mediates Macrophage Polarization in Postoperative Cognitive Dysfunction Induced by Sevoflurane. *Curr Neurovasc Res*. 2020; 17:79–85.  
<https://doi.org/10.2174/1567202617666200128142728>  
PMID:32003673
13. York B, O'Malley BW. Steroid receptor coactivator (SRC) family: masters of systems biology. *J Biol Chem*. 2010; 285:38743–50.  
<https://doi.org/10.1074/jbc.R110.193367>  
PMID:20956538
14. Meijer OC, Steenbergen PJ, De Kloet ER. Differential expression and regional distribution of steroid receptor coactivators SRC-1 and SRC-2 in brain and pituitary. *Endocrinology*. 2000; 141:2192–9.  
<https://doi.org/10.1210/endo.141.6.7489>  
PMID:10830308
15. Zhu L, Yang Y, Xu P, Zou F, Yan X, Liao L, Xu J, O'Malley BW, Xu Y. Steroid receptor coactivator-1 mediates estrogenic actions to prevent body weight gain in female mice. *Endocrinology*. 2013; 154:150–8.  
<https://doi.org/10.1210/en.2012-2007>  
PMID:23211707
16. Picard F, Géhin M, Annicotte J, Rocchi S, Champy MF, O'Malley BW, Chambon P, Auwerx J. SRC-1 and TIF2 control energy balance between white and brown adipose tissues. *Cell*. 2002; 111:931–41.  
[https://doi.org/10.1016/s0092-8674\(02\)01169-8](https://doi.org/10.1016/s0092-8674(02)01169-8)  
PMID:12507421
17. Yang Y, van der Klaauw AA, Zhu L, Cacciottolo TM, He Y, Stadler LKJ, Wang C, Xu P, Saito K, Hinton A Jr, Yan X, Keogh JM, Henning E, et al, and UK10K Consortium. Steroid receptor coactivator-1 modulates the function of Pomc neurons and energy homeostasis. *Nat Commun*. 2019; 10:1718.  
<https://doi.org/10.1038/s41467-019-08737-6>  
PMID:30979869
18. Pharmaceuticals R. Rhythm Pharmaceuticals Announces Positive Data with Setmelanotide in Additional MC4R Pathway Deficiency-related Obesities. *Globe Newswire*. 2021.
19. Wu Q, Wang B, Li QF, Zhang X, Ntim M, Wu XF, Li N, Zhu DD, Jiang R, Yang JY, Yuan YH, Li S. SRC-1 Knockout Exerts No Effect on Amyloid  $\beta$  Deposition in APP/PS1 Mice. *Front Aging Neurosci*. 2020; 12:145.  
<https://doi.org/10.3389/fnagi.2020.00145>  
PMID:32625077
20. Bian C, Huang Y, Zhu H, Zhao Y, Zhao J, Zhang J. Steroid Receptor Coactivator-1 Knockdown Decreases Synaptic Plasticity and Impairs Spatial Memory in the Hippocampus of Mice. *Neuroscience*. 2018; 377:114–25.  
<https://doi.org/10.1016/j.neuroscience.2018.02.034>  
PMID:29524638
21. Chen X, Tian Y, Zhu H, Bian C, Li M. Inhibition of steroid receptor coactivator-1 in the hippocampus impairs the consolidation and reconsolidation of contextual fear memory in mice. *Life Sci*. 2020; 245:117386.  
<https://doi.org/10.1016/j.lfs.2020.117386>  
PMID:32006528
22. Zhang D, Guo Q, Bian C, Zhang J, Lin S, Su B. Alterations of steroid receptor coactivator-1 (SRC-1) immunoreactivities in specific brain regions of young and middle-aged female Sprague-Dawley rats. *Brain Res*. 2011; 1382:88–97.  
<https://doi.org/10.1016/j.brainres.2011.01.024>  
PMID:21241680
23. Dobin A, Davis CA, Schlesinger F, Drenkow J, Zaleski C, Jha S, Batut P, Chaisson M, Gingeras TR. STAR: ultrafast universal RNA-seq aligner. *Bioinformatics*. 2013; 29:15–21.  
<https://doi.org/10.1093/bioinformatics/bts635>  
PMID:23104886
24. Liao Y, Smyth GK, Shi W. featureCounts: an efficient general purpose program for assigning sequence

- p reads to genomic features.
- Bioinformatics*
- . 2014; 30:923–30.
- 
- <https://doi.org/10.1093/bioinformatics/btt656>
- 
- PMID:
- [24227677](https://pubmed.ncbi.nlm.nih.gov/24227677/)
25. Love MI, Huber W, Anders S. Moderated estimation of fold change and dispersion for RNA-seq data with DESeq2. *Genome Biol*. 2014; 15:550.  
<https://doi.org/10.1186/s13059-014-0550-8>  
PMID: [25516281](https://pubmed.ncbi.nlm.nih.gov/25516281/)
  26. Subramanian A, Tamayo P, Mootha VK, Mukherjee S, Ebert BL, Gillette MA, Paulovich A, Pomeroy SL, Golub TR, Lander ES, Mesirov JP. Gene set enrichment analysis: a knowledge-based approach for interpreting genome-wide expression profiles. *Proc Natl Acad Sci U S A*. 2005; 102:15545–50.  
<https://doi.org/10.1073/pnas.0506580102>  
PMID: [16199517](https://pubmed.ncbi.nlm.nih.gov/16199517/)
  27. Shen S, Park JW, Lu ZX, Lin L, Henry MD, Wu YN, Zhou Q, Xing Y. rMATS: robust and flexible detection of differential alternative splicing from replicate RNA-Seq data. *Proc Natl Acad Sci U S A*. 2014; 111:E5593–601.  
<https://doi.org/10.1073/pnas.1419161111>  
PMID: [25480548](https://pubmed.ncbi.nlm.nih.gov/25480548/)
  28. Chen WT, Lu A, Craessaerts K, Pavie B, Sala Frigerio C, Corthout N, Qian X, Laláková J, Kühnemund M, Voytyuk I, Wolfs L, Mancuso R, Salta E, et al. Spatial Transcriptomics and In Situ Sequencing to Study Alzheimer's Disease. *Cell*. 2020; 182:976–91.e19.  
<https://doi.org/10.1016/j.cell.2020.06.038>  
PMID: [32702314](https://pubmed.ncbi.nlm.nih.gov/32702314/)
  29. Butler A, Hoffman P, Smibert P, Papalexi E, Satija R. Integrating single-cell transcriptomic data across different conditions, technologies, and species. *Nat Biotechnol*. 2018; 36:411–20.  
<https://doi.org/10.1038/nbt.4096>  
PMID: [29608179](https://pubmed.ncbi.nlm.nih.gov/29608179/)
  30. Liu H, He Y, Liu H, Brouwers B, Yin N, Lawler K, Keogh JM, Henning E, Lee DK, Yu M, Tu L, Zhang N, Conde KM, et al. Neural circuits expressing the serotonin 2C receptor regulate memory in mice and humans. *Sci Adv*. 2024; 10:eadl2675.  
<https://doi.org/10.1126/sciadv.adl2675>  
PMID: [38941473](https://pubmed.ncbi.nlm.nih.gov/38941473/)
  31. Leger M, Quiedeville A, Bouet V, Haelewyn B, Boulouard M, Schumann-Bard P, Freret T. Object recognition test in mice. *Nat Protoc*. 2013; 8:2531–7.  
<https://doi.org/10.1038/nprot.2013.155>  
PMID: [24263092](https://pubmed.ncbi.nlm.nih.gov/24263092/)
  32. Lin L, Pang W, Chen K, Wang F, Gengler J, Sun Y, Tong Q. Adipocyte expression of PU.1 transcription factor causes insulin resistance through upregulation of inflammatory cytokine gene expression and ROS production. *Am J Physiol Endocrinol Metab*. 2012; 302:E1550–9.  
<https://doi.org/10.1152/ajpendo.00462.2011>  
PMID: [22454293](https://pubmed.ncbi.nlm.nih.gov/22454293/)
  33. Sheng JG, Mrak RE, Griffin WS. S100 beta protein expression in Alzheimer disease: potential role in the pathogenesis of neuritic plaques. *J Neurosci Res*. 1994; 39:398–404.  
<https://doi.org/10.1002/jnr.490390406>  
PMID: [7884819](https://pubmed.ncbi.nlm.nih.gov/7884819/)
  34. Van Eldik LJ, Griffin WS. S100 beta expression in Alzheimer's disease: relation to neuropathology in brain regions. *Biochim Biophys Acta*. 1994; 1223:398–403.  
[https://doi.org/10.1016/0167-4889\(94\)90101-5](https://doi.org/10.1016/0167-4889(94)90101-5)  
PMID: [7918676](https://pubmed.ncbi.nlm.nih.gov/7918676/)
  35. Cristóvão JS, Gomes CM. S100 Proteins in Alzheimer's Disease. *Front Neurosci*. 2019; 13:463.  
<https://doi.org/10.3389/fnins.2019.00463>  
PMID: [31156365](https://pubmed.ncbi.nlm.nih.gov/31156365/)
  36. Depp C, Sun T, Sasmita AO, Spieth L, Berghoff SA, Nazarenko T, Overhoff K, Steixner-Kumar AA, Subramanian S, Arinrad S, Ruhwedel T, Möbius W, Göbbels S, et al. Myelin dysfunction drives amyloid- $\beta$  deposition in models of Alzheimer's disease. *Nature*. 2023; 618:349–57.  
<https://doi.org/10.1038/s41586-023-06120-6>  
PMID: [37258678](https://pubmed.ncbi.nlm.nih.gov/37258678/)
  37. Nasrabady SE, Rizvi B, Goldman JE, Brickman AM. White matter changes in Alzheimer's disease: a focus on myelin and oligodendrocytes. *Acta Neuropathol Commun*. 2018; 6:22.  
<https://doi.org/10.1186/s40478-018-0515-3>  
PMID: [29499767](https://pubmed.ncbi.nlm.nih.gov/29499767/)
  38. Xia Q, Li X, Zhou H, Zheng L, Shi J. S100A11 protects against neuronal cell apoptosis induced by cerebral ischemia via inhibiting the nuclear translocation of annexin A1. *Cell Death Dis*. 2018; 9:657.  
<https://doi.org/10.1038/s41419-018-0686-7>  
PMID: [29844306](https://pubmed.ncbi.nlm.nih.gov/29844306/)
  39. Ramos-Campoy O, Lladó A, Bosch B, Ferrer M, Pérez-Millan A, Vergara M, Molina-Porcel L, Fort-Aznar L, Gonzalo R, Moreno-Izco F, Fernandez-Villullas G, Balasa M, Sánchez-Valle R, Antonell A. Differential Gene Expression in Sporadic and Genetic Forms of Alzheimer's Disease and Frontotemporal Dementia in Brain Tissue and Lymphoblastoid Cell Lines. *Mol Neurobiol*. 2022; 59:6411–28.  
<https://doi.org/10.1007/s12035-022-02969-2>  
PMID: [35962298](https://pubmed.ncbi.nlm.nih.gov/35962298/)
  40. Bojarski L, Herms J, Kuznicki J. Calcium dysregulation in Alzheimer's disease. *Neurochem Int*. 2008; 52:621–33.

<https://doi.org/10.1016/j.neuint.2007.10.002>  
PMID:18035450

41. Halder B, Hamilton CL, Solodushko V, Abney KA, Alexeyev M, Honkanen RE, Scammell JG, Cioffi DL. S100A6 is a positive regulator of PPP5C-FKBP51-dependent regulation of endothelial calcium signaling. *FASEB J*. 2020; 34:3179–96.  
<https://doi.org/10.1096/fj.201901777R>  
PMID:31916625
42. Wruck W, Schröter F, Adjaye J. Meta-Analysis of Transcriptome Data Related to Hippocampus Biopsies and iPSC-Derived Neuronal Cells from Alzheimer's Disease Patients Reveals an Association with FOXA1 and FOXA2 Gene Regulatory Networks. *J Alzheimers Dis*. 2016; 50:1065–82.  
<https://doi.org/10.3233/JAD-150733>  
PMID:26890743
43. Boom A, Pochet R, Authélet M, Pradier L, Borghgraef P, Van Leuven F, Heizmann CW, Brion JP. Astrocytic calcium/zinc binding protein S100A6 over expression in Alzheimer's disease and in PS1/APP transgenic mice models. *Biochim Biophys Acta*. 2004; 1742:161–8.  
<https://doi.org/10.1016/j.bbamcr.2004.09.011>  
PMID:15590066
44. Wirths O, Breyhan H, Marcello A, Cotel MC, Brück W, Bayer TA. Inflammatory changes are tightly associated with neurodegeneration in the brain and spinal cord of the APP/PS1KI mouse model of Alzheimer's disease. *Neurobiol Aging*. 2010; 31:747–57.  
<https://doi.org/10.1016/j.neurobiolaging.2008.06.011>  
PMID:18657882
45. Weissmann R, Hüttenrauch M, Kacprowski T, Bouter Y, Pradier L, Bayer TA, Kuss AW, Wirths O. Gene Expression Profiling in the APP/PS1KI Mouse Model of Familial Alzheimer's Disease. *J Alzheimers Dis*. 2016; 50:397–409.  
<https://doi.org/10.3233/JAD-150745>  
PMID:26639971
46. Tian ZY, Wang CY, Wang T, Li YC, Wang ZY. Glial S100A6 Degrades  $\beta$ -amyloid Aggregation through Targeting Competition with Zinc Ions. *Aging Dis*. 2019; 10:756–69.  
<https://doi.org/10.14336/AD.2018.0912>  
PMID:31440382
47. Filipiek A, Leśniak W. S100A6 and Its Brain Ligands in Neurodegenerative Disorders. *Int J Mol Sci*. 2020; 21:3979.  
<https://doi.org/10.3390/ijms21113979>  
PMID:32492924
48. Nuzzo D, Inguglia L, Walters J, Picone P, Di Carlo M. A Shotgun Proteomics Approach Reveals a New Toxic Role for Alzheimer's Disease A $\beta$  Peptide: Spliceosome Impairment. *J Proteome Res*. 2017; 16:1526–41.  
<https://doi.org/10.1021/acs.jproteome.6b00925>  
PMID:28157316
49. Hsieh YC, Guo C, Yalamanchili HK, Abreha M, Al-Ouran R, Li Y, Dammer EB, Lah JJ, Levey AI, Bennett DA, De Jager PL, Seyfried NT, Liu Z, Shulman JM. Tau-Mediated Disruption of the Spliceosome Triggers Cryptic RNA Splicing and Neurodegeneration in Alzheimer's Disease. *Cell Rep*. 2019; 29:301–16.e10.  
<https://doi.org/10.1016/j.celrep.2019.08.104>  
PMID:31597093
50. Biamonti G, Amato A, Belloni E, Di Matteo A, Infantino L, Pradella D, Ghigna C. Alternative splicing in Alzheimer's disease. *Aging Clin Exp Res*. 2021; 33:747–58.  
<https://doi.org/10.1007/s40520-019-01360-x>  
PMID:31583531
51. Cohen SJ, Stackman RW Jr. Assessing rodent hippocampal involvement in the novel object recognition task. A review. *Behav Brain Res*. 2015; 285:105–17.  
<https://doi.org/10.1016/j.bbr.2014.08.002>  
PMID:25169255
52. Cinalli DA Jr, Cohen SJ, Guthrie K, Stackman RW Jr. Object Recognition Memory: Distinct Yet Complementary Roles of the Mouse CA1 and Perirhinal Cortex. *Front Mol Neurosci*. 2020; 13:527543.  
<https://doi.org/10.3389/fnmol.2020.527543>  
PMID:33192287
53. Xu C, Krabbe S, Gründemann J, Botta P, Fadok JP, Osakada F, Saur D, Grewe BF, Schnitzer MJ, Callaway EM, Lüthi A. Distinct Hippocampal Pathways Mediate Dissociable Roles of Context in Memory Retrieval. *Cell*. 2016; 167:961–72.e16.  
<https://doi.org/10.1016/j.cell.2016.09.051>  
PMID:27773481
54. Kim WB, Cho JH. Encoding of contextual fear memory in hippocampal-amygdala circuit. *Nat Commun*. 2020; 11:1382.  
<https://doi.org/10.1038/s41467-020-15121-2>  
PMID:32170133
55. Al-Sabri MH, Nikpour M, Clemensson LE, Attwood MM, Williams MJ, Rask-Anderson M, Mwinyi J, Schiöth HB. The regulatory role of AP-2 $\beta$  in monoaminergic neurotransmitter systems: insights on its signalling pathway, linked disorders and theragnostic potential. *Cell Biosci*. 2022; 12:151.  
<https://doi.org/10.1186/s13578-022-00891-7>  
PMID:36076256

56. Cheng Z, Zou X, Jin Y, Gao S, Lv J, Li B, Cui R. The Role of KLF4 in Alzheimer's Disease. *Front Cell Neurosci.* 2018; 12:325.  
<https://doi.org/10.3389/fncel.2018.00325>  
PMID:[30297986](https://pubmed.ncbi.nlm.nih.gov/30297986/)
57. Jia L, Piña-Crespo J, Li Y. Restoring Wnt/ $\beta$ -catenin signaling is a promising therapeutic strategy for Alzheimer's disease. *Mol Brain.* 2019; 12:104.  
<https://doi.org/10.1186/s13041-019-0525-5>  
PMID:[31801553](https://pubmed.ncbi.nlm.nih.gov/31801553/)
58. Kim B, Dabin LC, Tate MD, Karahan H, Sharify AD, Acri DJ, Al-Amin MM, Philtjens S, Smith DC, Wijeratne HRS, Park JH, Jucker M, Kim J. Effects of SPI1-mediated transcriptome remodeling on Alzheimer's disease-related phenotypes in mouse models of A $\beta$  amyloidosis. *Nat Commun.* 2024; 15:3996.  
<https://doi.org/10.1038/s41467-024-48484-x>  
PMID:[38734693](https://pubmed.ncbi.nlm.nih.gov/38734693/)
59. Liu J, Xiao Q, Xiao J, Niu C, Li Y, Zhang X, Zhou Z, Shu G, Yin G. Wnt/ $\beta$ -catenin signalling: function, biological mechanisms, and therapeutic opportunities. *Signal Transduct Target Ther.* 2022; 7:3.  
<https://doi.org/10.1038/s41392-021-00762-6>  
PMID:[34980884](https://pubmed.ncbi.nlm.nih.gov/34980884/)
60. Villa C, Ridolfi E, Fenoglio C, Ghezzi L, Vimercati R, Clerici F, Marcone A, Gallone S, Serpente M, Cantoni C, Bonsi R, Cioffi S, Cappa S, et al. Expression of the transcription factor Sp1 and its regulatory hsa-miR-29b in peripheral blood mononuclear cells from patients with Alzheimer's disease. *J Alzheimers Dis.* 2013; 35:487–94.  
<https://doi.org/10.3233/JAD-122263>  
PMID:[23435408](https://pubmed.ncbi.nlm.nih.gov/23435408/)
61. Ohno M. Failures to reconsolidate memory in a mouse model of Alzheimer's disease. *Neurobiol Learn Mem.* 2009; 92:455–9.  
<https://doi.org/10.1016/j.nlm.2009.05.001>  
PMID:[19435612](https://pubmed.ncbi.nlm.nih.gov/19435612/)
62. Dodge JC, Tamsett TJ, Treleaven CM, Taksir TV, Piepenhagen P, Sardi SP, Cheng SH, Shihabuddin LS. Glucosylceramide synthase inhibition reduces ganglioside GM3 accumulation, alleviates amyloid neuropathology, and stabilizes remote contextual memory in a mouse model of Alzheimer's disease. *Alzheimers Res Ther.* 2022; 14:19.  
<https://doi.org/10.1186/s13195-022-00966-0>  
PMID:[35105352](https://pubmed.ncbi.nlm.nih.gov/35105352/)
63. Gong B, Cao Z, Zheng P, Vitolo OV, Liu S, Staniszewski A, Moolman D, Zhang H, Shelanski M, Arancio O. Ubiquitin hydrolase Uch-L1 rescues beta-amyloid-induced decreases in synaptic function and contextual memory. *Cell.* 2006; 126:775–88.  
<https://doi.org/10.1016/j.cell.2006.06.046>  
PMID:[16923396](https://pubmed.ncbi.nlm.nih.gov/16923396/)
64. Stover KR, Campbell MA, Van Winssen CM, Brown RE. Early detection of cognitive deficits in the 3xTg-AD mouse model of Alzheimer's disease. *Behav Brain Res.* 2015; 289:29–38.  
<https://doi.org/10.1016/j.bbr.2015.04.012>  
PMID:[25896362](https://pubmed.ncbi.nlm.nih.gov/25896362/)
65. Bellio TA, Laguna-Torres JY, Campion MS, Chou J, Yee S, Blusztajn JK, Mellott TJ. Perinatal choline supplementation prevents learning and memory deficits and reduces brain amyloid A $\beta$ 42 deposition in AppNL-G-F Alzheimer's disease model mice. *PLoS One.* 2024; 19:e0297289.  
<https://doi.org/10.1371/journal.pone.0297289>  
PMID:[38315685](https://pubmed.ncbi.nlm.nih.gov/38315685/)
66. Fang B, Liang M, Yang G, Ye Y, Xu H, He X, Huang JH. Expression of S100A6 in rat hippocampus after traumatic brain injury due to lateral head acceleration. *Int J Mol Sci.* 2014; 15:6378–90.  
<https://doi.org/10.3390/ijms15046378>  
PMID:[24739809](https://pubmed.ncbi.nlm.nih.gov/24739809/)



SUPPLEMENTARY MATERIALS

Supplementary Figures

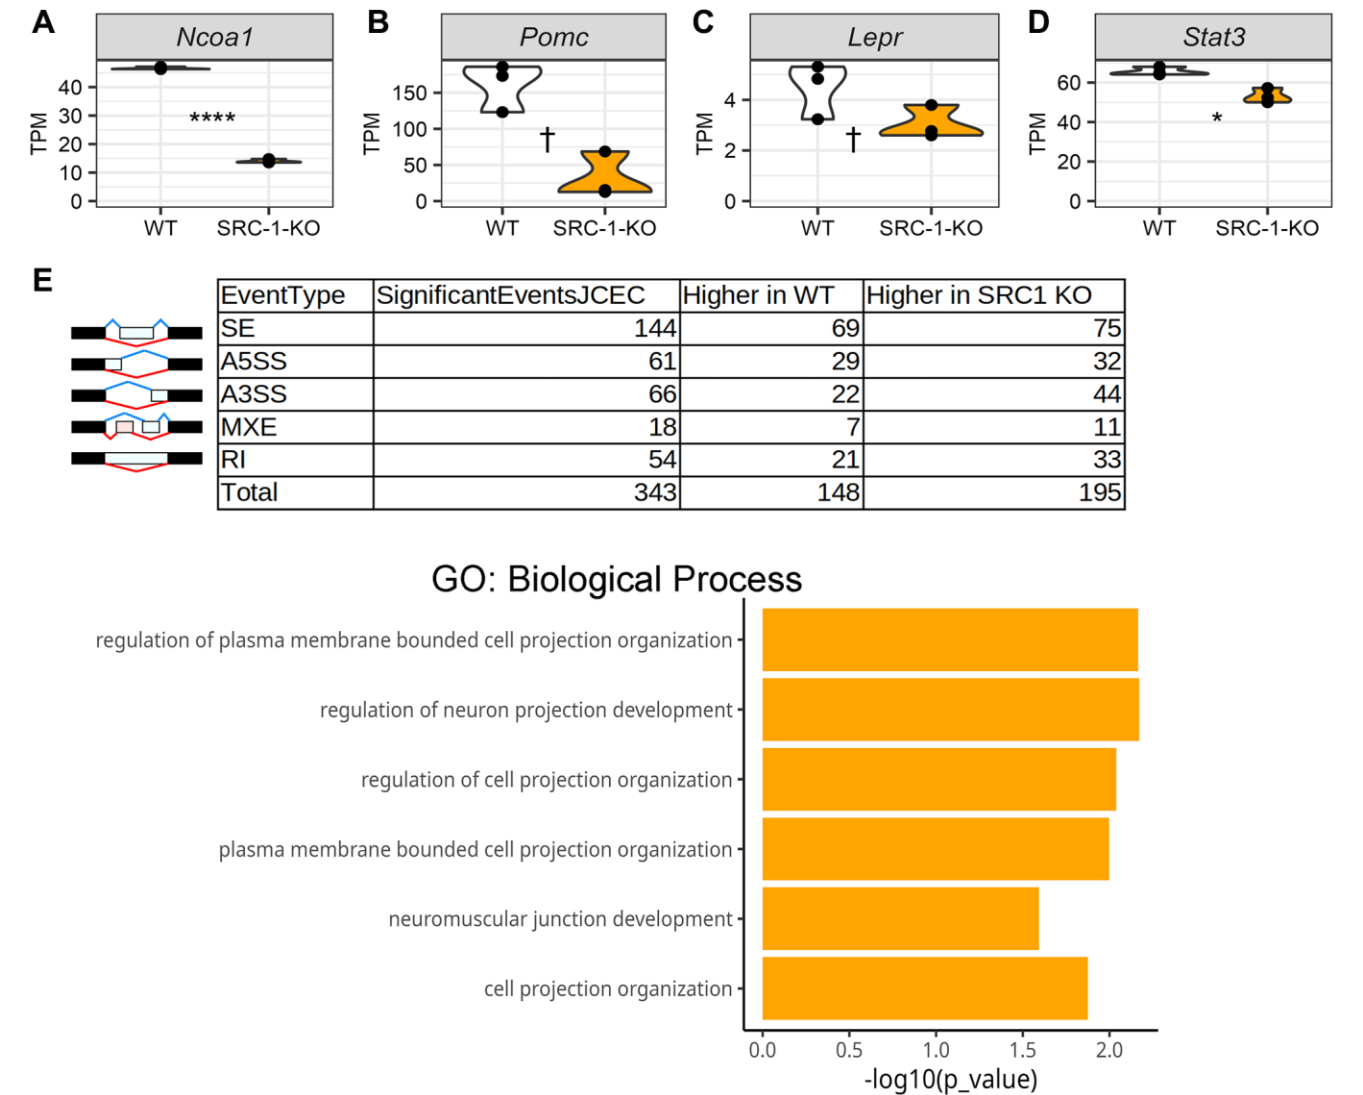

**Supplementary Figure 1. Differential gene expression in the hypothalamus of SRC-1-KO mice.** (A–D) Violin plots for the expression of SRC-1 coding gene *Ncoa1* (A), POMC coding gene *Pomc* (B), leptin receptor gene *Lepr* (C) and *Stat3* (D) based on the RNA-Seq analysis. <sup>†</sup>*P*<sub>adj</sub> < 0.1; \**P*<sub>adj</sub> < 0.05; \*\*\*\**P*<sub>adj</sub> < 0.0001. (E) Multivariate analysis of transcript splicing. Table documents the total number of splicing events detected with MATS software and those deemed significant with a *P*<sub>adj</sub> < 0.05 and absolute inclusion level difference > 0.2. Splicing events were either: skipped exon (SE), alternative 5' splice site (A5SS), alternative 3' splicing site (A3SS), mutually exclusive exons (MXE), or retained intron (RI). Diagram to left of table depicts each event showing alternative pathways in red and blue. Graph below is the GO analysis for the alternative splicing events.

### A Contextual Memory SRC-1<sup>L1376P</sup>

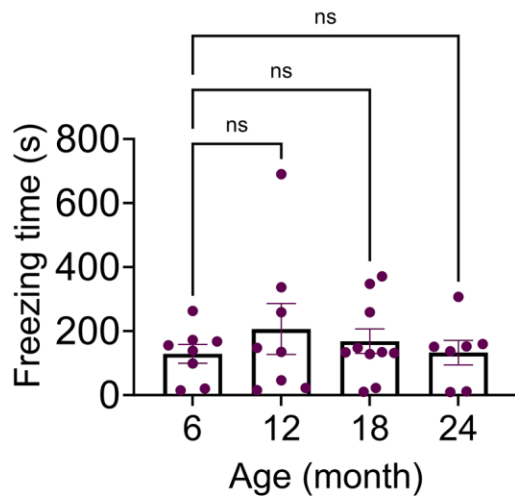

### B Contextual Memory SRC-1-KO

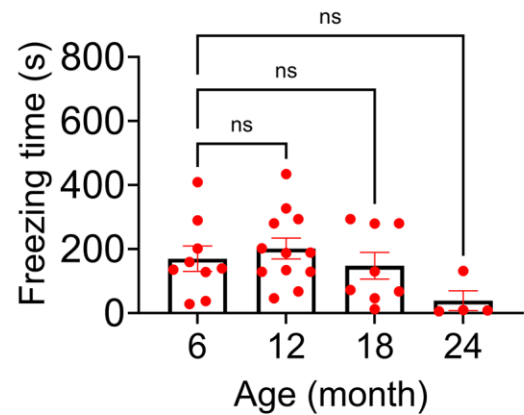

### C RAWM STM Latency

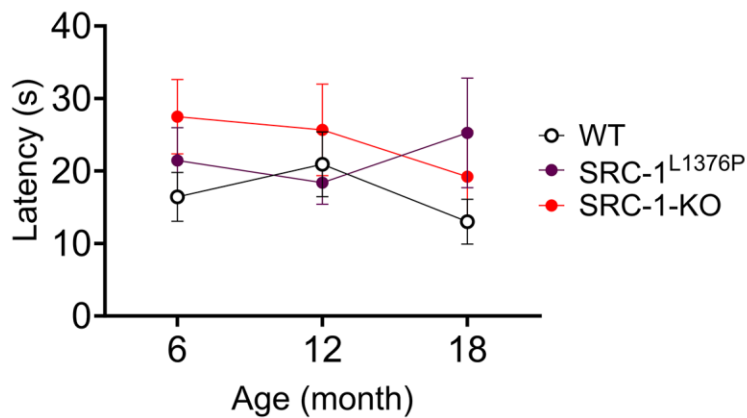

### D RAWM LTM Latency

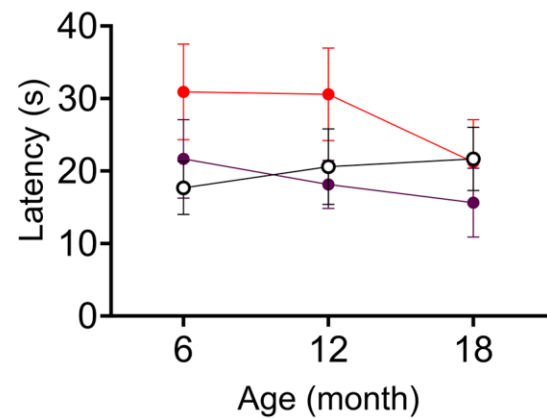

**Supplementary Figure 2. Cognitive functions of SRC-1 KO mice and SRC-1<sup>L1376P</sup> mice at different ages.** (A, B) Freezing time in the fear conditioning test in SRC-1 KO mice (A) and SRC-1<sup>L1376P</sup> mice (B) at different ages. (C, D) The latency that each mouse touched the escape platform in RAWM test at 30 minutes (C) or 24 hours (D) after the last learning session. STM, short term memory. LTM: long term memory. *N* = 8–12 mice/group. Data are presented as mean ± SEM and/or with individual data points.

## Hippocampus

## Hypothalamus

## Hippocampus

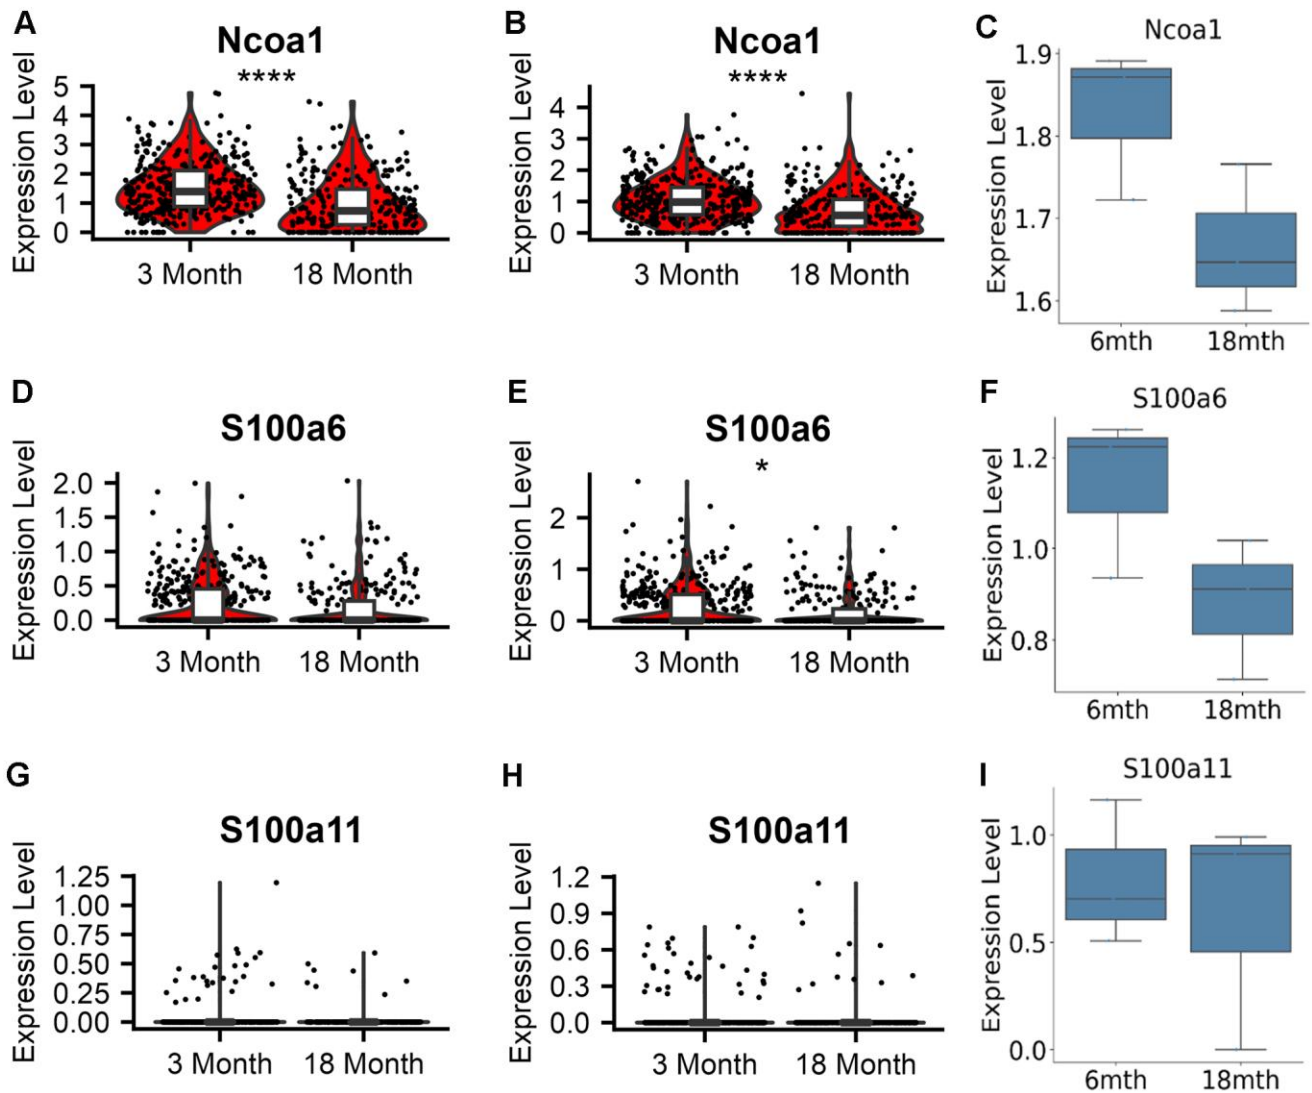

**Supplementary Figure 3. Aging-associated changes in the expression of SRC-1, S100a6 and S100a11 in mice.** Secondary analysis of published spatial RNA-Seq data (3 months of age vs 18 months of age) and bulk RNA-Seq data (6 months of age vs 18 months of age) revealed the differential gene expression between young and aged WT mice. (A–C) The expression of SRC-1 coding gene *Ncoa1* in the hippocampus (A), hypothalamus (B), and hippocampus (C, bulk) of young and aged mice. (D–F) The expression of *S100a6* in the hippocampus (D), hypothalamus (E), and hippocampus (F, bulk) of young and aged mice. (G–I) The expression of *S100a11* in the hippocampus (G), hypothalamus (H), and hippocampus (I, bulk) of young and aged mice. \* and \*\*\*\* $P < 0.05$  or  $0.0001$  in Wilcox test followed by Bonferroni correction for multiple comparisons via Seurat 5.1.0.  $N = 3$  for C, F and I.

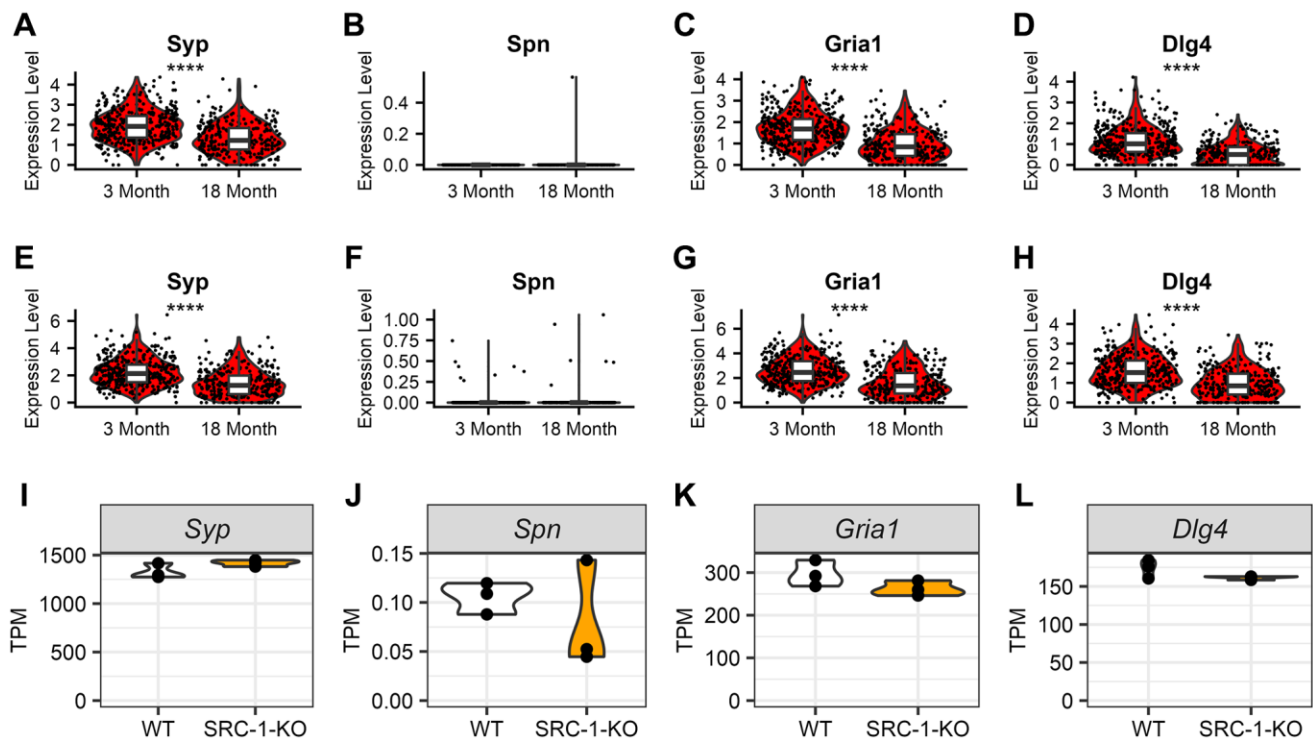

**Supplementary Figure 4. The expression of synaptic proteins in aged mice and SRC-1-KO mice.** (A–D) Secondary analysis of published spatial RNA-Seq data revealed the differential expression of synaptic protein coding genes, including Synaptophysin (A and E), Spinophilin (B and F), GluR1 (C and G) and PSD-95 (D and H), in the hippocampus (A–D) and hypothalamus (E–H) of young (3 months of age) and old (18 months of age) WT. (I–L) RNA-Seq analysis revealed the differential expression of synaptic protein coding genes, including Synaptophysin (I), Spinophilin (J), GluR1 (K) and PSD-95 (L), in the hypothalamus of young WT and SRC-1-KO mice. \*\*\*\* $P < 0.0001$  in Wilcoxon test followed by Bonferroni correction for multiple comparisons via Seurat 5.1.0.



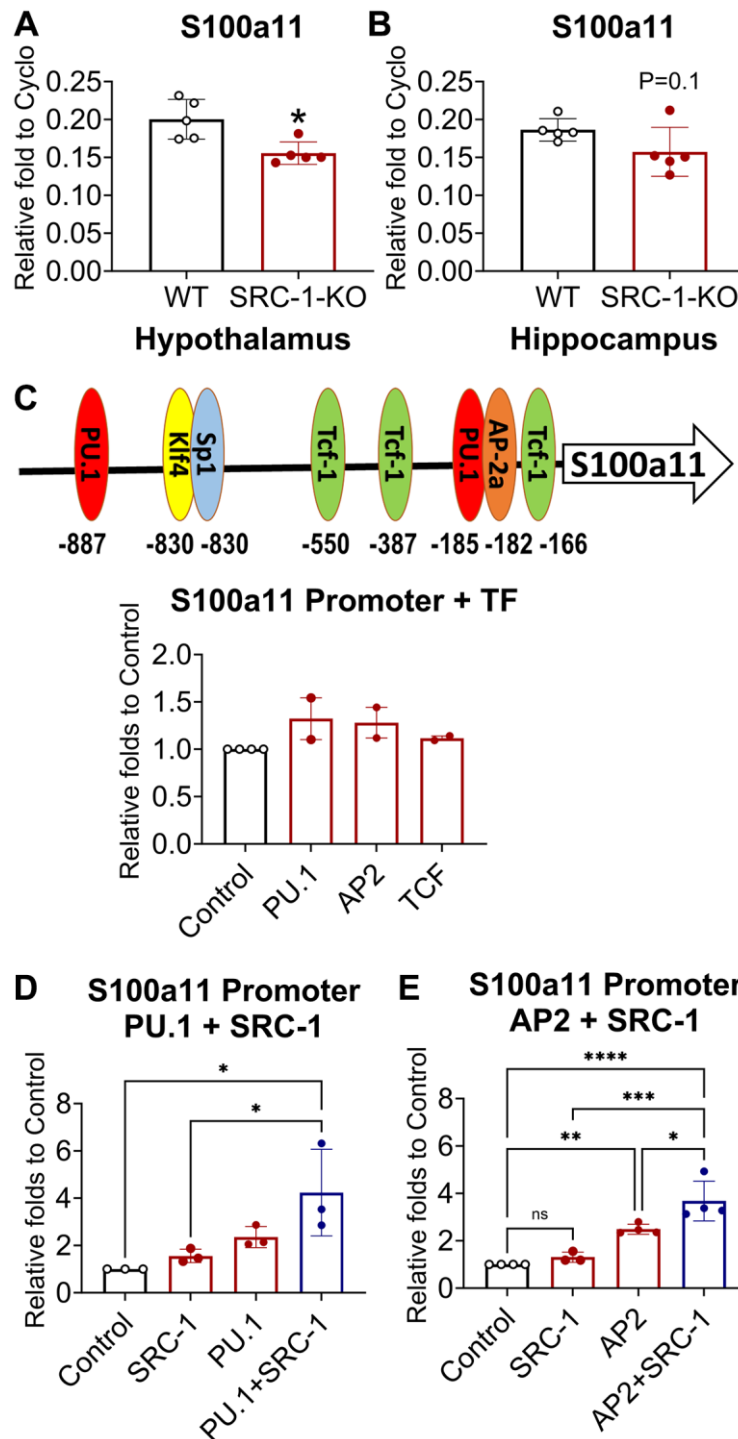

**Supplementary Figure 5. The regulation of S100a11 by transcription factors and SRC-1.** (A B) Relative mRNA levels of S100a11 mRNA measured in the hypothalamus (A) and the hippocampus (B) isolated from control vs. SRC-1KO mice using Q-PCR. Data are presented as mean  $\pm$  SEM.  $N = 5$  samples per group.  $^*P < 0.05$  in unpaired two-tailed  $t$ -tests. (C) Binding sites of transcription factors on the promoter of S100a11 and the effect of indicated transcription factor on S100a11 promoter luciferase activity in Neuro 2A cells. Data are presented as mean  $\pm$  SEM.  $N = 2$ –4 repeated experiments with 6 biological replicates per group in each experiment. (D, E) Effects of SRC-1 and transcription factors PU.1 (D) and AP2 (E) on S100a11 promoter luciferase activity in SRC-1KO MEF cells. Data are presented as mean  $\pm$  SEM.  $N = 3$ –4 repeated experiments with 3 biological replicates per group in each experiment. Control group is normalized to 1 to allow comparisons among different batches of experiments.  $^*P < 0.05$ ,  $^{**}P < 0.01$  and  $^{***}P < 0.001$ ,  $^{****}P < 0.0001$  in one-way ANOVA analyses followed by Sidak tests.

## **Supplementary data**

Please browse Full Text version to see the data of Supplementary data 1.

### **Supplementary Data 1.**
