# Supplementary material for: A protective role of SRC-1 against aging associated cognitive decline
Source: Aging (Albany NY). 2025 Aug 27;17(8):2167–88. doi: 10.18632/aging.206311 (PMC12422791; doi:10.18632/aging.206311)
Supplement: Supplementary Data 1 [file aging-17-8-206311-s002.xlsx]

## Sheet: Supplementary Data
Supplementary Data 1
gene	baseMean	log2FoldChange	lfcSE	stat	pvalue	padj	significant	log2(src1KO/wt)
Gm46386	52.0682	-9.10718	1.23289	-7.38688	1.50313e-13	1.37185e-10	yes	9.10718
Gm9282	50.5247	-9.06349	1.23349	-7.34782	2.01467e-13	1.67883e-10	yes	9.06349
LOC118567990	31.0103	-8.35837	1.29045	-6.47712	9.34905e-11	3.81243e-08	yes	8.35837
Gm46313	25.7801	-8.09258	1.26685	-6.38794	1.68131e-10	6.31845e-08	yes	8.09258
Gm38702	27.4336	-5.29638	0.848289	-6.2436	4.27608e-10	1.4901e-07	yes	5.29638
Gm2423	430.755	-3.96859	0.38637	-10.2715	9.47312e-25	3.02603e-21	yes	3.96859
Gm7993	112.504	-3.94903	0.342769	-11.521	1.03442e-30	9.91287e-27	yes	3.94903
LOC118567995	64.1981	-3.86846	0.504611	-7.66623	1.77132e-14	1.88606e-11	yes	3.86846
Gm40847	17.9061	-3.81125	0.734496	-5.18893	2.11511e-07	2.87504e-05	yes	3.81125
Gm48606	35.0834	-3.55512	0.573529	-6.19866	5.69445e-10	1.78918e-07	yes	3.55512
Gm52012	34.3672	-2.61909	0.53428	-4.90209	9.48208e-07	0.000100963	yes	2.61909
Gm32719	37.8018	-2.40911	0.429889	-5.60402	2.09439e-08	4.31624e-06	yes	2.40911
Tbr1	132.188	-2.26717	0.257043	-8.82021	1.14247e-18	1.99059e-15	yes	2.26717
Samd3	64.1133	-2.03667	0.357261	-5.70079	1.19252e-08	2.71502e-06	yes	2.03667
Amd2	44.9674	-2.02291	0.388972	-5.20066	1.98583e-07	2.71861e-05	yes	2.02291
Shox2	34.9582	-1.86177	0.460296	-4.04472	5.2386e-05	0.0029705	yes	1.86177
Clca4a	22.898	-1.84027	0.523415	-3.5159	0.000438274	0.0153284	yes	1.84027
Gm9292	31.5377	-1.80827	0.484718	-3.73056	0.000191055	0.0079777	yes	1.80827
Gm9269	115.909	-1.69351	0.324706	-5.21552	1.83301e-07	2.57584e-05	yes	1.69351
Gm46022	40.4773	-1.6464	0.409625	-4.01929	5.83732e-05	0.00321489	yes	1.6464
Rps7-ps3	159.882	-1.64398	0.248235	-6.62266	3.52796e-11	1.64919e-08	yes	1.64398
LOC115488002	23.9898	-1.63351	0.501882	-3.25478	0.00113481	0.0311156	yes	1.63351
B230206H07Rik	125.403	-1.13575	0.339575	-3.34462	0.000823968	0.0245339	yes	1.13575
ATP8	139.295	-1.00457	0.270187	-3.71807	0.000200753	0.00829232	yes	1.00457
Opalin	1086.3	-1.00419	0.126812	-7.91876	2.39884e-15	3.06508e-12	yes	1.00419
Sh3tc2	167.059	-0.968139	0.220951	-4.38169	1.17765e-05	0.000839064	yes	0.968139
Insc	175.165	-0.960798	0.219839	-4.37047	1.2398e-05	0.000864073	yes	0.960798
5033421B08Rik	84.4757	-0.953029	0.270531	-3.52281	0.000426999	0.0150439	yes	0.953029
Trim59	743.6	-0.944663	0.170826	-5.52996	3.20311e-08	6.0187e-06	yes	0.944663
LOC118568506	311.19	-0.918557	0.20401	-4.50252	6.71537e-06	0.000518082	yes	0.918557
Ppp1r14a	376.329	-0.915474	0.189795	-4.82348	1.41072e-06	0.000137248	yes	0.915474
2600006K01Rik	82.126	-0.9095	0.288605	-3.15136	0.00162511	0.0404506	yes	0.9095
Gm34982	417.129	-0.909381	0.213588	-4.25765	2.0659e-05	0.00130677	yes	0.909381
Gm19500	226.939	-0.894773	0.225343	-3.97072	7.16569e-05	0.00372189	yes	0.894773
Cyp2j12	148.687	-0.879728	0.24628	-3.57207	0.000354171	0.0128076	yes	0.879728
TrnM	118.772	-0.876488	0.279574	-3.13509	0.00171803	0.0421611	yes	0.876488
Tmem88b	3236.17	-0.873885	0.122005	-7.16267	7.91195e-13	5.46099e-10	yes	0.873885
Pisd-ps3	4660.53	-0.861067	0.261849	-3.28842	0.00100753	0.0285656	yes	0.861067
Nkx6-2	955.664	-0.859498	0.157648	-5.45201	4.98028e-08	8.83816e-06	yes	0.859498
Enpp6	354.416	-0.85362	0.16314	-5.23243	1.67297e-07	2.41083e-05	yes	0.85362
1700047M11Rik	242.507	-0.845219	0.231208	-3.65567	0.000256513	0.00993196	yes	0.845219
Meis2	816.052	-0.830044	0.147981	-5.60913	2.03347e-08	4.27262e-06	yes	0.830044
Nipal4	208.447	-0.826638	0.213286	-3.87573	0.000106307	0.00506905	yes	0.826638
Gjb1	543.733	-0.824378	0.175458	-4.69844	2.6216e-06	0.000232619	yes	0.824378
Adamts4	1714.75	-0.820894	0.132064	-6.21588	5.10376e-10	1.71478e-07	yes	0.820894
Ugt8a	3036.18	-0.81975	0.130516	-6.28084	3.36758e-10	1.19524e-07	yes	0.81975
Pax6	260.733	-0.811912	0.185865	-4.36828	1.2523e-05	0.000866482	yes	0.811912
LOC118568781	165.259	-0.799443	0.249177	-3.20834	0.00133505	0.0351962	yes	0.799443
Ermn	2857.45	-0.788896	0.125324	-6.29484	3.0771e-10	1.11275e-07	yes	0.788896
Tmem125	355.714	-0.782864	0.152677	-5.12758	2.93485e-07	3.80063e-05	yes	0.782864
Fa2h	1583.59	-0.781728	0.145367	-5.37763	7.54744e-08	1.23636e-05	yes	0.781728
C030029H02Rik	171.396	-0.778744	0.214617	-3.62853	0.000285044	0.0108181	yes	0.778744
Mag	8816.14	-0.77865	0.119223	-6.53103	6.53203e-11	2.76595e-08	yes	0.77865
Serpinb1a	543.554	-0.774469	0.176683	-4.38338	1.1685e-05	0.000838781	yes	0.774469
Gm5977	662.74	-0.769813	0.186335	-4.13134	3.60655e-05	0.00213343	yes	0.769813
Gjc2	535.513	-0.768347	0.184444	-4.16576	3.10319e-05	0.00187621	yes	0.768347
Galnt6	764.169	-0.765319	0.138886	-5.51039	3.58038e-08	6.59823e-06	yes	0.765319
Slc30a3	137.534	-0.764011	0.223588	-3.41705	0.000633037	0.0200874	yes	0.764011
A230001M10Rik	195.897	-0.763018	0.209294	-3.64567	0.000266699	0.0102027	yes	0.763018
Aspa	1004.89	-0.759673	0.130248	-5.83252	5.45968e-09	1.29185e-06	yes	0.759673
Trf	13849.1	-0.759256	0.22603	-3.3591	0.000781962	0.0238936	yes	0.759256
Fgf11	1176.39	-0.758523	0.158588	-4.78298	1.72719e-06	0.000164693	yes	0.758523
Elovl7	816.206	-0.7565	0.14678	-5.15396	2.55038e-07	3.37108e-05	yes	0.7565
Adi1	1914.67	-0.755807	0.108977	-6.93548	4.04833e-12	2.50291e-09	yes	0.755807
Alox8	331.376	-0.751197	0.225832	-3.32635	0.000879924	0.0257605	yes	0.751197
Tmem63a	1622.28	-0.74073	0.144596	-5.12276	3.01101e-07	3.87308e-05	yes	0.74073
Gm13293	110.306	-0.732533	0.236769	-3.09387	0.00197564	0.046632	yes	0.732533
Evi2a	864.804	-0.727752	0.135032	-5.38948	7.06618e-08	1.1675e-05	yes	0.727752
Mobp	37368.8	-0.717573	0.129968	-5.52115	3.36794e-08	6.26699e-06	yes	0.717573
Litaf	868.308	-0.712412	0.146291	-4.86982	1.11701e-06	0.000114331	yes	0.712412
Smyd1	493.61	-0.712376	0.191634	-3.71738	0.000201299	0.00829698	yes	0.712376
Chdh	258.628	-0.710839	0.20643	-3.44349	0.000574254	0.0185289	yes	0.710839
Erbb3	660.083	-0.709951	0.153989	-4.61039	4.01912e-06	0.000330603	yes	0.709951
Mbp	103526	-0.699834	0.114583	-6.10766	1.011e-09	3.12531e-07	yes	0.699834
Syt2	2955.06	-0.696169	0.130462	-5.3362	9.49163e-08	1.49112e-05	yes	0.696169
Cdc42ep2	408.738	-0.686673	0.146428	-4.68947	2.73907e-06	0.000240812	yes	0.686673
Bcas1	6947.74	-0.685349	0.0956987	-7.16153	7.97807e-13	5.46099e-10	yes	0.685349
S1pr5	591.761	-0.676906	0.148698	-4.55224	5.3079e-06	0.000422121	yes	0.676906
Cdc42ep1	1123.73	-0.675677	0.124944	-5.40784	6.37895e-08	1.09349e-05	yes	0.675677
Gatm	4723.51	-0.674679	0.114231	-5.90629	3.49897e-09	8.70926e-07	yes	0.674679
Car2	6630.4	-0.670903	0.110146	-6.09101	1.12201e-09	3.36007e-07	yes	0.670903
Pde8a	1162.71	-0.668947	0.119645	-5.59112	2.25611e-08	4.50423e-06	yes	0.668947
Rasgrp3	739.887	-0.668766	0.154427	-4.33063	1.48681e-05	0.00100693	yes	0.668766
Plp1	80771.1	-0.668422	0.107612	-6.21143	5.25043e-10	1.71478e-07	yes	0.668422
Creb5	300.909	-0.665251	0.175527	-3.79002	0.000150636	0.00662177	yes	0.665251
Pllp	2264.2	-0.659893	0.106288	-6.20856	5.34709e-10	1.71478e-07	yes	0.659893
Map6d1	1187.07	-0.648004	0.132079	-4.90619	9.28631e-07	9.9431e-05	yes	0.648004
Mog	1034.94	-0.645093	0.147533	-4.37253	1.22815e-05	0.000862224	yes	0.645093
Prr5l	664.345	-0.643416	0.149566	-4.30189	1.6935e-05	0.00111538	yes	0.643416
Plekhh1	2067.26	-0.64311	0.139249	-4.61843	3.8665e-06	0.00031942	yes	0.64311
Prrg1	289.773	-0.64019	0.15487	-4.13372	3.56941e-05	0.00211799	yes	0.64019
Sytl2	1698.3	-0.628177	0.115052	-5.45993	4.76313e-08	8.61228e-06	yes	0.628177
Gjc3	2712.81	-0.625712	0.11885	-5.26474	1.40385e-07	2.08576e-05	yes	0.625712
Prr18	1743.86	-0.623082	0.118109	-5.2755	1.32398e-07	1.9987e-05	yes	0.623082
Igh	174.752	-0.622462	0.199765	-3.11598	0.00183335	0.0440949	yes	0.622462
TrnE	448.319	-0.617183	0.191873	-3.21662	0.00129709	0.0345221	yes	0.617183
Anln	1557.72	-0.610562	0.153105	-3.98787	6.66694e-05	0.00354559	yes	0.610562
Gm31166	252.9	-0.607875	0.163454	-3.71894	0.000200058	0.00828143	yes	0.607875
Sox10	1938.57	-0.6019	0.12354	-4.87209	1.10422e-06	0.000113948	yes	0.6019
Gal3st1	448.409	-0.59316	0.151778	-3.90809	9.30294e-05	0.00454847	yes	0.59316
2900092D14Rik	364.292	-0.591105	0.168772	-3.50238	0.000461124	0.0159063	yes	0.591105
A330102I10Rik	241.057	-0.588845	0.166537	-3.53581	0.000406523	0.0144996	yes	0.588845
Septin4	8342.72	-0.585195	0.110166	-5.31195	1.08457e-07	1.67636e-05	yes	0.585195
Ghsr	441.259	0.591644	0.156251	3.78649	0.000152788	0.00668926	yes	-0.591644
Etnppl	3313.46	0.597115	0.128165	4.65894	3.17835e-06	0.000274398	yes	-0.597115
Rin1	232.63	0.597781	0.187585	3.18672	0.00143896	0.0372188	yes	-0.597781
Map3k19	602.615	0.603109	0.129747	4.64836	3.34578e-06	0.000283491	yes	-0.603109
Deptor	1783.71	0.611134	0.108982	5.60765	2.05093e-08	4.27262e-06	yes	-0.611134
Ubxn10	476.822	0.612966	0.140221	4.37141	1.23444e-05	0.000863478	yes	-0.612966
Gpc4	729.88	0.613841	0.156263	3.92825	8.55675e-05	0.00425244	yes	-0.613841
Kif6	237.279	0.615524	0.177645	3.46492	0.000530393	0.0174566	yes	-0.615524
Cngb1	832.765	0.616522	0.157965	3.9029	9.50467e-05	0.00463528	yes	-0.616522
Ulk4	409.742	0.616802	0.157789	3.90903	9.26663e-05	0.00454231	yes	-0.616802
Rnf138rt1	164.692	0.618146	0.187509	3.29661	0.000978581	0.0280771	yes	-0.618146
Npy1r	800.708	0.621305	0.130992	4.74309	2.10486e-06	0.000193951	yes	-0.621305
C2	228.536	0.622359	0.164815	3.7761	0.000159301	0.00690759	yes	-0.622359
AI467606	290.833	0.625807	0.196914	3.17807	0.00148259	0.0379378	yes	-0.625807
Dock8	243.26	0.626768	0.174183	3.59834	0.000320257	0.0118267	yes	-0.626768
Vit	308.093	0.627176	0.155484	4.0337	5.49051e-05	0.00306796	yes	-0.627176
Ifitm3	269.532	0.632811	0.196777	3.21587	0.00130048	0.0345221	yes	-0.632811
Ccdc114	319.092	0.636456	0.183761	3.46349	0.000533216	0.0174694	yes	-0.636456
Ctsh	368.51	0.641212	0.146321	4.38224	1.17465e-05	0.000839064	yes	-0.641212
Acvr1c	335.19	0.641597	0.172629	3.71662	0.000201908	0.00830424	yes	-0.641597
Arhgap6	2151.54	0.64266	0.136358	4.71304	2.44049e-06	0.00022168	yes	-0.64266
Slc13a3	853.479	0.644077	0.167375	3.8481	0.000119036	0.00545798	yes	-0.644077
Kl	438.867	0.646121	0.151517	4.26433	2.00501e-05	0.00128522	yes	-0.646121
Slc9a2	276.993	0.648785	0.198921	3.26152	0.00110818	0.0305163	yes	-0.648785
Lgr6	365.049	0.654961	0.142516	4.5957	4.31308e-06	0.000351764	yes	-0.654961
1700086L19Rik	610.93	0.657102	0.145957	4.50203	6.73079e-06	0.000518082	yes	-0.657102
Scara3	559.027	0.657821	0.184335	3.56862	0.000358863	0.0129043	yes	-0.657821
Usp51	313.088	0.659017	0.195343	3.37364	0.000741803	0.0229313	yes	-0.659017
Serpine1	173.932	0.663421	0.19151	3.46415	0.000531913	0.0174566	yes	-0.663421
Sft2d2	1773.09	0.66405	0.118608	5.5987	2.1596e-08	4.4033e-06	yes	-0.66405
Fbln5	488.267	0.665136	0.190681	3.48822	0.000486246	0.0165063	yes	-0.665136
Ahnak	1595.74	0.668903	0.138771	4.82018	1.43425e-06	0.000138833	yes	-0.668903
Net1	715.573	0.673124	0.173847	3.87193	0.000107978	0.00509731	yes	-0.673124
Ddr2	352.109	0.679104	0.214392	3.16758	0.00153712	0.0388147	yes	-0.679104
Bmp3	260.832	0.682809	0.165055	4.13685	3.52105e-05	0.00209579	yes	-0.682809
Togaram2	639.837	0.6842	0.141803	4.82501	1.39996e-06	0.000136896	yes	-0.6842
Nnat	28832	0.695638	0.108123	6.43375	1.24491e-10	4.97084e-08	yes	-0.695638
Antxr1	1513.89	0.697711	0.0947284	7.36538	1.76647e-13	1.53892e-10	yes	-0.697711
S100a11	148.895	0.697764	0.2001	3.48708	0.000488317	0.0165063	yes	-0.697764
1700094D03Rik	495.475	0.698996	0.174372	4.00864	6.10682e-05	0.00335368	yes	-0.698996
Tnxb	517.444	0.704369	0.140317	5.01984	5.17137e-07	6.04356e-05	yes	-0.704369
Nek10	548.172	0.707101	0.181525	3.89533	9.8064e-05	0.00477029	yes	-0.707101
Ston1	391.244	0.714262	0.149839	4.76685	1.8713e-06	0.00017581	yes	-0.714262
Mns1	199.683	0.718412	0.227491	3.15798	0.00158866	0.0398538	yes	-0.718412
Slc16a2	1212.56	0.727818	0.110423	6.59119	4.36317e-11	1.99106e-08	yes	-0.727818
Mc3r	355.316	0.728484	0.19808	3.67774	0.000235314	0.00937462	yes	-0.728484
Erbb2	130.616	0.728823	0.202951	3.59113	0.000329245	0.0121352	yes	-0.728823
Crip1	122.654	0.72981	0.230304	3.16889	0.00153021	0.0387423	yes	-0.72981
Fndc9	686.706	0.730474	0.161027	4.53635	5.72367e-06	0.000451439	yes	-0.730474
Rasd1	385.473	0.730685	0.182714	3.99906	6.35944e-05	0.00346264	yes	-0.730685
Ezr	1241.1	0.730984	0.122544	5.9651	2.4449e-09	6.45756e-07	yes	-0.730984
Eno4	289.859	0.735608	0.187638	3.92036	8.8417e-05	0.00435809	yes	-0.735608
Pdyn	3006.45	0.736128	0.136347	5.39893	6.70406e-08	1.12711e-05	yes	-0.736128
Ccdc113	194.713	0.740768	0.201475	3.67672	0.000236249	0.00937462	yes	-0.740768
Itga11	124.892	0.743461	0.216356	3.43628	0.000589762	0.0188704	yes	-0.743461
Btg2	607.846	0.744704	0.148236	5.02376	5.06685e-07	5.95775e-05	yes	-0.744704
Ccdc96	134.525	0.746657	0.215195	3.46968	0.000521081	0.0172786	yes	-0.746657
Acss3	294.202	0.748655	0.163872	4.56854	4.91143e-06	0.000392218	yes	-0.748655
Rfx2	263.342	0.748894	0.177397	4.22157	2.4261e-05	0.00150481	yes	-0.748894
Fkbp5	1524.85	0.751265	0.15678	4.79186	1.65244e-06	0.000158353	yes	-0.751265
Kif27	295.609	0.751856	0.194609	3.86342	0.00011181	0.005214	yes	-0.751856
Cybrd1	281.229	0.752682	0.168269	4.47308	7.71015e-06	0.0005864	yes	-0.752682
Rai14	294.805	0.753733	0.161646	4.66287	3.11837e-06	0.000270437	yes	-0.753733
Lrriq1	166.417	0.759595	0.198977	3.81751	0.000134807	0.00605086	yes	-0.759595
Chia1	152.189	0.759879	0.245733	3.0923	0.00198614	0.0467459	yes	-0.759879
Fbln1	457.489	0.762265	0.196923	3.87088	0.000108443	0.00510645	yes	-0.762265
Cfap100	344.431	0.762401	0.219684	3.47045	0.000519595	0.0172592	yes	-0.762401
5330413P13Rik	118.641	0.762795	0.227317	3.35565	0.000791796	0.024012	yes	-0.762795
Mxra8	477.16	0.763352	0.128165	5.95602	2.58462e-09	6.69418e-07	yes	-0.763352
Gcnt1	116.687	0.76592	0.235738	3.24903	0.001158	0.0316158	yes	-0.76592
Mamdc2	195.101	0.767852	0.185546	4.13834	3.49823e-05	0.00208869	yes	-0.767852
Rrad	282.181	0.77096	0.154442	4.99192	5.9783e-07	6.77989e-05	yes	-0.77096
Cfap45	277.724	0.774478	0.184165	4.20535	2.60675e-05	0.00159619	yes	-0.774478
Xdh	231.457	0.775284	0.206123	3.76126	0.000169058	0.00729766	yes	-0.775284
Vgll3	214.694	0.775306	0.251725	3.07998	0.00207015	0.0482097	yes	-0.775306
Slc12a7	427.891	0.775605	0.171938	4.51095	6.45367e-06	0.000502809	yes	-0.775605
1700007K13Rik	173.164	0.785154	0.207073	3.79167	0.000149635	0.00660809	yes	-0.785154
Tmem106a	102.121	0.788066	0.239474	3.29081	0.000998977	0.028365	yes	-0.788066
Colec12	514.984	0.790373	0.200751	3.93709	8.24769e-05	0.00414895	yes	-0.790373
Vstm4	219.565	0.793271	0.198023	4.00596	6.17652e-05	0.00338226	yes	-0.793271
Vim	1520.76	0.797419	0.11687	6.82311	8.90888e-12	5.02199e-09	yes	-0.797419
Nuf2	151.105	0.807719	0.218013	3.70491	0.000211464	0.00862323	yes	-0.807719
Vwa3b	96.3492	0.808146	0.254813	3.17152	0.00151642	0.0385461	yes	-0.808146
Fsip1	88.6446	0.812155	0.255861	3.1742	0.00150251	0.0382431	yes	-0.812155
Kif9	378.626	0.812161	0.165736	4.90033	9.5678e-07	0.000101313	yes	-0.812161
Fosl2	545.377	0.814524	0.168434	4.83586	1.32572e-06	0.000132337	yes	-0.814524
Nbl1	919.695	0.814808	0.173354	4.70025	2.5984e-06	0.000231632	yes	-0.814808
Slc17a8	130.059	0.817913	0.225969	3.61957	0.000295088	0.0111332	yes	-0.817913
Il1r1	134.13	0.827374	0.227199	3.64163	0.00027092	0.010323	yes	-0.827374
Nt5dc2	237.411	0.830712	0.204125	4.06962	4.70897e-05	0.00270216	yes	-0.830712
A2m	357.958	0.835496	0.196221	4.25794	2.06316e-05	0.00130677	yes	-0.835496
Ccdc60	112.707	0.843718	0.2508	3.36411	0.000767913	0.0235862	yes	-0.843718
Cfap43	537.049	0.844802	0.163709	5.16038	2.46453e-07	3.28022e-05	yes	-0.844802
Tnfrsf11b	92.7949	0.844817	0.260722	3.24029	0.00119406	0.0323241	yes	-0.844817
Mdh1b	89.1337	0.851498	0.261488	3.25635	0.00112854	0.0309879	yes	-0.851498
LOC108167751	443.629	0.857482	0.164717	5.20579	1.93177e-07	2.68293e-05	yes	-0.857482
Mapk15	243.447	0.858109	0.242871	3.53319	0.000410577	0.0145455	yes	-0.858109
Klf5	142.668	0.861752	0.215872	3.99195	6.55312e-05	0.00352801	yes	-0.861752
Myof	190.515	0.864916	0.197687	4.37517	1.21338e-05	0.000854988	yes	-0.864916
Dlec1	330.989	0.865002	0.203343	4.25391	2.1007e-05	0.00132441	yes	-0.865002
Map3k6	146.016	0.867329	0.217222	3.99282	6.5291e-05	0.00352498	yes	-0.867329
Cd24a	948.807	0.868142	0.155373	5.58747	2.304e-08	4.55241e-06	yes	-0.868142
S100a6	392.573	0.868258	0.20907	4.15296	3.282e-05	0.00197187	yes	-0.868258
Catip	212.469	0.870294	0.217468	4.00195	6.28237e-05	0.00343043	yes	-0.870294
Zmynd10	190.961	0.871087	0.225831	3.85726	0.000114667	0.00528296	yes	-0.871087
Ccdc3	284.49	0.872082	0.190068	4.58827	4.46936e-06	0.000362965	yes	-0.872082
Junb	532.181	0.873265	0.149584	5.83795	5.28468e-09	1.26608e-06	yes	-0.873265
Dnah2	428.008	0.879254	0.174142	5.04906	4.43995e-07	5.3381e-05	yes	-0.879254
Fgf10	225.464	0.879465	0.167387	5.25407	1.48772e-07	2.17662e-05	yes	-0.879465
Cfap161	216.588	0.883175	0.233546	3.78159	0.000155829	0.00677684	yes	-0.883175
Ccbe1	103.536	0.886811	0.236979	3.74216	0.000182446	0.0077706	yes	-0.886811
Pawr	73.8312	0.887616	0.279004	3.18137	0.00146581	0.0377096	yes	-0.887616
Cfap44	852.504	0.887901	0.155795	5.69915	1.20409e-08	2.71502e-06	yes	-0.887901
Smim3	241.613	0.889349	0.223283	3.98306	6.80326e-05	0.0035626	yes	-0.889349
Mrc2	396.137	0.889491	0.176075	5.05177	4.37738e-07	5.30993e-05	yes	-0.889491
Fam183b	501.163	0.891935	0.190433	4.68373	2.81701e-06	0.000246534	yes	-0.891935
Pih1d2	97.3701	0.894662	0.280888	3.18512	0.00144695	0.0373246	yes	-0.894662
Lrrc10b	123.993	0.895605	0.220264	4.06605	4.78169e-05	0.0027357	yes	-0.895605
Lhx2	184.6	0.896784	0.190729	4.70187	2.57794e-06	0.000230882	yes	-0.896784
Ttc25	185.639	0.900665	0.200538	4.49125	7.08076e-06	0.000542839	yes	-0.900665
Spag6l	355.765	0.902537	0.180609	4.99718	5.81753e-07	6.71679e-05	yes	-0.902537
2900060N12Rik	147.518	0.906439	0.260363	3.48145	0.000498715	0.0167397	yes	-0.906439
Gstm2	97.9208	0.91207	0.285175	3.19828	0.00138248	0.0361976	yes	-0.91207
Rassf9	121.684	0.913525	0.276215	3.3073	0.000942003	0.0272165	yes	-0.913525
Rsph4a	673.81	0.916551	0.153347	5.97696	2.27339e-09	6.22454e-07	yes	-0.916551
Socs3	107.973	0.917273	0.287835	3.1868	0.00143855	0.0372188	yes	-0.917273
Iqcg	317.126	0.91808	0.18406	4.98794	6.10264e-07	6.88019e-05	yes	-0.91808
Iqub	169.877	0.920063	0.190655	4.82581	1.39437e-06	0.000136896	yes	-0.920063
Bace2	185.328	0.920369	0.197732	4.65462	3.24584e-06	0.000278968	yes	-0.920369
Cdc14a	315.959	0.923427	0.148749	6.20795	5.36818e-10	1.71478e-07	yes	-0.923427
Vwa3a	668.201	0.935571	0.178696	5.23555	1.64491e-07	2.38836e-05	yes	-0.935571
Grpr	79.9595	0.93867	0.255435	3.6748	0.000238038	0.00940666	yes	-0.93867
Dnaaf3	107.637	0.940235	0.291999	3.21999	0.00128194	0.0342196	yes	-0.940235
Cped1	181.812	0.943836	0.281632	3.35131	0.000804304	0.0241998	yes	-0.943836
Fam90a1b	96.2064	0.944283	0.304274	3.10339	0.00191315	0.0455497	yes	-0.944283
Sox3	93.9565	0.944804	0.302678	3.12148	0.00179946	0.043546	yes	-0.944804
Agbl2	103.778	0.945341	0.244132	3.87225	0.000107834	0.00509731	yes	-0.945341
Col4a6	84.8923	0.946632	0.292396	3.2375	0.0012058	0.0325157	yes	-0.946632
Tm4sf1	542.011	0.95508	0.172376	5.54069	3.01279e-08	5.71715e-06	yes	-0.95508
LOC118567915	278.922	0.961369	0.196599	4.89	1.00838e-06	0.00010619	yes	-0.961369
Lrrc9	534.213	0.967218	0.12744	7.58957	3.20977e-14	3.23781e-11	yes	-0.967218
Nek11	133.637	0.969591	0.214652	4.51704	6.2709e-06	0.000490564	yes	-0.969591
Dnah5	457.864	0.970155	0.190146	5.10214	3.35826e-07	4.26255e-05	yes	-0.970155
Celsr1	405.778	0.972695	0.143118	6.79646	1.0722e-11	5.87135e-09	yes	-0.972695
Spag8	187.457	0.973964	0.219233	4.44259	8.88805e-06	0.000662834	yes	-0.973964
Ccdc40	400.175	0.974243	0.148299	6.56944	5.05062e-11	2.25117e-08	yes	-0.974243
Cfap70	228.985	0.975023	0.218718	4.45791	8.27626e-06	0.000626968	yes	-0.975023
Crb2	304.902	0.975127	0.17459	5.58523	2.33387e-08	4.56437e-06	yes	-0.975127
Cfap61	243.678	0.980414	0.164385	5.96412	2.45957e-09	6.45756e-07	yes	-0.980414
Satb2	100.879	0.981384	0.309538	3.17048	0.00152187	0.0386333	yes	-0.981384
Tekt1	316.714	0.983425	0.18403	5.34383	9.1001e-08	1.44143e-05	yes	-0.983425
Ccdc24	99.7922	0.984533	0.254382	3.87029	0.000108705	0.00510645	yes	-0.984533
Myb	106.522	0.991166	0.291188	3.40388	0.000664371	0.0208402	yes	-0.991166
Lamb3	239.048	0.999159	0.258803	3.86069	0.000113066	0.00525627	yes	-0.999159
Foxj1	692.488	1.00246	0.315396	3.17843	0.00148077	0.0379378	yes	-1.00246
Rarres2	393.042	1.00784	0.188037	5.35982	8.33034e-08	1.33049e-05	yes	-1.00784
Scnn1a	204.415	1.00959	0.19462	5.1875	2.13136e-07	2.87674e-05	yes	-1.00959
Lrrc43	165.573	1.00981	0.274556	3.67799	0.000235079	0.00937462	yes	-1.00981
Ifitm1	75.539	1.00987	0.297191	3.39806	0.000678664	0.0211845	yes	-1.00987
Cdhr3	260.742	1.01376	0.23571	4.30086	1.70139e-05	0.00111674	yes	-1.01376
Ccdc81	200.614	1.0194	0.210153	4.85076	1.22987e-06	0.000124062	yes	-1.0194
Nfatc4	82.1389	1.02105	0.263561	3.87407	0.000107031	0.00509023	yes	-1.02105
Gm11992	122.157	1.02465	0.222864	4.59763	4.27319e-06	0.00035	yes	-1.02465
Fgl2	188.515	1.0251	0.258577	3.9644	7.35813e-05	0.00378085	yes	-1.0251
Casc1	149.865	1.02599	0.261539	3.9229	8.74906e-05	0.00433293	yes	-1.02599
Odf3b	179.489	1.03261	0.278855	3.70303	0.000213038	0.00865062	yes	-1.03261
Cfap54	784.996	1.03549	0.13787	7.51061	5.88525e-14	5.63983e-11	yes	-1.03549
Smoc2	62.3931	1.03566	0.332098	3.11853	0.00181756	0.0438733	yes	-1.03566
Rcn3	174.401	1.03795	0.20635	5.03002	4.90417e-07	5.80205e-05	yes	-1.03795
Antxr2	83.8408	1.03825	0.260213	3.98998	6.60787e-05	0.00353761	yes	-1.03825
Spata17	80.7959	1.04066	0.309107	3.36665	0.00076086	0.0234447	yes	-1.04066
Gm36908	61.4073	1.04368	0.294633	3.54231	0.000396639	0.0142093	yes	-1.04368
Egr4	54.6352	1.04945	0.320346	3.27599	0.00105293	0.0294177	yes	-1.04945
Rsph1	293.956	1.04992	0.194333	5.40266	6.56611e-08	1.11368e-05	yes	-1.04992
Gpx8	175.988	1.05168	0.198573	5.29617	1.18259e-07	1.81324e-05	yes	-1.05168
Flnc	173.808	1.05651	0.203103	5.20183	1.97335e-07	2.71861e-05	yes	-1.05651
Txnip	1086.06	1.05833	0.116363	9.09505	9.45405e-20	2.01329e-16	yes	-1.05833
Gm867	90.7991	1.06959	0.346892	3.08336	0.00204678	0.0478396	yes	-1.06959
Gm28729	105.258	1.07504	0.272774	3.94114	8.10944e-05	0.00410094	yes	-1.07504
Shisal2a	75.4442	1.07935	0.310001	3.48175	0.000498145	0.0167397	yes	-1.07935
Ppp1r32	174.18	1.07956	0.236161	4.57129	4.84731e-06	0.000388995	yes	-1.07956
F5	70.7986	1.08911	0.288652	3.7731	0.000161233	0.00697561	yes	-1.08911
Zbbx	47.0116	1.10171	0.344576	3.19728	0.0013873	0.0362741	yes	-1.10171
Cfap57	130.031	1.11406	0.238805	4.66515	3.08398e-06	0.00026867	yes	-1.11406
Prrg4	311.178	1.11838	0.168592	6.63366	3.27454e-11	1.569e-08	yes	-1.11838
Fzd5	647.18	1.12169	0.14555	7.70655	1.29266e-14	1.45736e-11	yes	-1.12169
Hydin	437.55	1.13284	0.369406	3.06666	0.00216463	0.0498646	yes	-1.13284
Egr1	1675.25	1.13681	0.118941	9.55781	1.20275e-21	3.29313e-18	yes	-1.13681
Gm19935	226.882	1.13687	0.218014	5.21469	1.84123e-07	2.57584e-05	yes	-1.13687
Inmt	59.2506	1.15219	0.325891	3.53549	0.000407012	0.0144996	yes	-1.15219
Dsg2	129.85	1.15236	0.270154	4.26556	1.99398e-05	0.00128244	yes	-1.15236
Plac9a	123.552	1.15426	0.243605	4.73825	2.1557e-06	0.000196743	yes	-1.15426
Gm32574	66.282	1.15731	0.320317	3.61303	0.000302638	0.0113357	yes	-1.15731
Tekt4	150.22	1.16032	0.295357	3.92853	8.54673e-05	0.00425244	yes	-1.16032
Krt18	113.766	1.16286	0.251645	4.62103	3.81848e-06	0.000316818	yes	-1.16286
Enkur	255.595	1.17003	0.220119	5.31546	1.06387e-07	1.65774e-05	yes	-1.17003
Dnah9	565.899	1.1755	0.16352	7.18872	6.53999e-13	4.9007e-10	yes	-1.1755
Fam166b	122.703	1.17864	0.305467	3.85848	0.000114093	0.00526917	yes	-1.17864
Tsku	145.467	1.1817	0.203928	5.79471	6.84389e-09	1.59963e-06	yes	-1.1817
Gm15478	143.842	1.18445	0.251649	4.70674	2.51712e-06	0.000226493	yes	-1.18445
Scn7a	977.767	1.18513	0.150984	7.84938	4.18085e-15	5.00813e-12	yes	-1.18513
Aox3	60.2639	1.18787	0.366691	3.23944	0.00119764	0.0323752	yes	-1.18787
Mlf1	99.7504	1.19554	0.271609	4.4017	1.07408e-05	0.000779769	yes	-1.19554
Sox14	120.886	1.19702	0.272826	4.38748	1.14673e-05	0.000826252	yes	-1.19702
4933406B17Rik	77.4107	1.20456	0.279829	4.30464	1.67259e-05	0.00111248	yes	-1.20456
Fbxl13	65.1447	1.20636	0.371959	3.24325	0.00118172	0.0320806	yes	-1.20636
Ager	65.1712	1.20708	0.305986	3.94489	7.98367e-05	0.00405875	yes	-1.20708
Lrrc23	362.24	1.21032	0.198889	6.08539	1.16208e-09	3.37461e-07	yes	-1.21032
Tcim	40.9962	1.21244	0.365231	3.31965	0.000901303	0.026213	yes	-1.21244
Tbx19	66.2617	1.21308	0.395423	3.0678	0.00215638	0.0497942	yes	-1.21308
Cd109	174.762	1.21708	0.237666	5.12098	3.03951e-07	3.88369e-05	yes	-1.21708
Cited1	740.854	1.2266	0.319929	3.83399	0.000126081	0.00572623	yes	-1.2266
Tbx3	518.817	1.22723	0.183475	6.68884	2.24953e-11	1.13459e-08	yes	-1.22723
Spef2	255.341	1.23687	0.204587	6.0457	1.48763e-09	4.25551e-07	yes	-1.23687
Wfikkn2	63.0073	1.23757	0.345977	3.57703	0.000347523	0.012591	yes	-1.23757
Cfap73	62.5406	1.23995	0.325884	3.80488	0.000141873	0.00632357	yes	-1.23995
Lrp2	227.134	1.24024	0.193723	6.40213	1.53222e-10	5.93215e-08	yes	-1.24024
Ccdc146	122.389	1.24394	0.325226	3.82484	0.000130854	0.00590108	yes	-1.24394
Morn5	37.5862	1.24442	0.371881	3.34628	0.000819031	0.0244891	yes	-1.24442
Efhb	97.922	1.25174	0.258524	4.84185	1.28634e-06	0.000129078	yes	-1.25174
Gstm6	1108.83	1.25396	0.29227	4.29043	1.78324e-05	0.0011625	yes	-1.25396
Nr5a2	92.7121	1.26654	0.345186	3.66914	0.000243364	0.00953848	yes	-1.26654
Efhc1	122.98	1.26696	0.23614	5.36528	8.08237e-08	1.31277e-05	yes	-1.26696
Adgb	339.132	1.26813	0.175463	7.22733	4.92587e-13	3.93372e-10	yes	-1.26813
Emp1	99.3724	1.27362	0.286858	4.4399	8.99992e-06	0.000668575	yes	-1.27362
Kcnmb1	100.082	1.28136	0.321646	3.98376	6.78336e-05	0.00356192	yes	-1.28136
Anxa2	619.739	1.2815	0.147492	8.68858	3.67e-18	5.41071e-15	yes	-1.2815
Shisal2b	63.7955	1.2858	0.321965	3.99361	6.50735e-05	0.00352316	yes	-1.2858
Wdr66	443.075	1.2865	0.211084	6.09475	1.09608e-09	3.33453e-07	yes	-1.2865
Slc6a19	78.982	1.3047	0.30113	4.33267	1.47313e-05	0.0010012	yes	-1.3047
Dnah11	245.035	1.30508	0.229843	5.67815	1.36162e-08	2.99964e-06	yes	-1.30508
Car13	62.0344	1.30537	0.414843	3.14665	0.00165155	0.040949	yes	-1.30537
Slc26a7	92.3656	1.31117	0.355659	3.6866	0.000227271	0.00917028	yes	-1.31117
Frzb	274.924	1.31764	0.183349	7.18648	6.64814e-13	4.9007e-10	yes	-1.31764
Fam166c	48.3705	1.31796	0.401894	3.27937	0.00104041	0.0292382	yes	-1.31796
Rgs22	188.224	1.32185	0.272344	4.85359	1.21244e-06	0.00012295	yes	-1.32185
Ttc16	104.563	1.32351	0.312062	4.24118	2.22344e-05	0.00139263	yes	-1.32351
Rasl11a	72.8475	1.32428	0.284844	4.64915	3.33305e-06	0.000283491	yes	-1.32428
Fam47e	42.3889	1.32785	0.390914	3.39677	0.00068186	0.0212151	yes	-1.32785
Procr	33.8505	1.328	0.419062	3.16897	0.00152979	0.0387423	yes	-1.328
Capsl	89.6046	1.33872	0.274729	4.87288	1.09982e-06	0.000113948	yes	-1.33872
1700016K19Rik	75.962	1.34804	0.338068	3.98747	6.67827e-05	0.00354559	yes	-1.34804
Kiss1	37.8461	1.34969	0.439569	3.07048	0.00213712	0.049409	yes	-1.34969
H2-Eb1	113.971	1.36081	0.315047	4.3194	1.56452e-05	0.00105212	yes	-1.36081
Gem	107.69	1.36323	0.267527	5.09567	3.47505e-07	4.38176e-05	yes	-1.36323
Armc4	63.8423	1.3742	0.333655	4.11862	3.81149e-05	0.00223398	yes	-1.3742
Smim5	80.9163	1.37421	0.279366	4.91904	8.69705e-07	9.41738e-05	yes	-1.37421
Cfap206	177.615	1.37782	0.235598	5.84819	4.96941e-09	1.20562e-06	yes	-1.37782
Tcte1	63.6956	1.38508	0.358496	3.86359	0.000111735	0.005214	yes	-1.38508
Tshr	112.971	1.38669	0.247168	5.6103	2.01979e-08	4.27262e-06	yes	-1.38669
Traf1	136.037	1.38923	0.265591	5.23069	1.6888e-07	2.41549e-05	yes	-1.38923
Prelp	975.865	1.39029	0.14657	9.48556	2.41086e-21	5.77583e-18	yes	-1.39029
Gas2l2	60.4045	1.39543	0.308132	4.52869	5.93517e-06	0.000466203	yes	-1.39543
Armc3	104.925	1.406	0.266518	5.27544	1.3244e-07	1.9987e-05	yes	-1.406
Pla2g5	58.7557	1.41742	0.352226	4.02419	5.71725e-05	0.00316338	yes	-1.41742
Lrrc18	70.4181	1.4214	0.325605	4.36539	1.26894e-05	0.000874835	yes	-1.4214
Rd3	66.4129	1.42763	0.337171	4.23413	2.29442e-05	0.0014324	yes	-1.42763
Nek5	96.2322	1.42849	0.293216	4.87181	1.10583e-06	0.000113948	yes	-1.42849
Cfap126	257.318	1.43216	0.215861	6.63464	3.25292e-11	1.569e-08	yes	-1.43216
Armh1	48.3126	1.43321	0.397135	3.60886	0.00030754	0.011488	yes	-1.43321
Gm31455	56.9742	1.43404	0.389944	3.67754	0.00023549	0.00937462	yes	-1.43404
Pifo	90.8148	1.44003	0.266301	5.40753	6.39001e-08	1.09349e-05	yes	-1.44003
Daw1	76.5233	1.44454	0.387834	3.72464	0.000195595	0.00813184	yes	-1.44454
Wdr93	47.3439	1.45042	0.364082	3.98377	6.78301e-05	0.00356192	yes	-1.45042
Crym	181.681	1.45598	0.233619	6.23229	4.59677e-10	1.57324e-07	yes	-1.45598
Crispld2	160.534	1.47636	0.273923	5.38968	7.05823e-08	1.1675e-05	yes	-1.47636
1700028P14Rik	45.6808	1.47741	0.384627	3.84114	0.000122466	0.00558852	yes	-1.47741
Ptx4	56.5545	1.48263	0.35249	4.20616	2.59749e-05	0.00159563	yes	-1.48263
Cfap53	46.023	1.48295	0.372237	3.98388	6.77989e-05	0.00356192	yes	-1.48295
Drc7	240.957	1.48636	0.232222	6.40061	1.54757e-10	5.93215e-08	yes	-1.48636
Cd74	223.64	1.49464	0.457587	3.26636	0.00108941	0.0302166	yes	-1.49464
Lum	81.8748	1.4971	0.313311	4.77833	1.7676e-06	0.000167712	yes	-1.4971
Hkdc1	50.1248	1.49888	0.377902	3.96631	7.29937e-05	0.00377088	yes	-1.49888
Kdelr3	24.2369	1.50335	0.483222	3.1111	0.00186392	0.044599	yes	-1.50335
Crygn	24.2137	1.50436	0.480964	3.12781	0.00176115	0.0428898	yes	-1.50436
Gpr50	907.638	1.50561	0.140066	10.7493	5.97159e-27	2.28903e-23	yes	-1.50561
Tmem52	51.7555	1.50632	0.416557	3.61613	0.000299043	0.0112602	yes	-1.50632
Dnaaf1	33.1403	1.50794	0.458965	3.28551	0.00101797	0.0287764	yes	-1.50794
Fos	696.411	1.51017	0.167201	9.03207	1.68456e-19	3.22863e-16	yes	-1.51017
Tcp11	49.7824	1.51095	0.381954	3.95584	7.62658e-05	0.00390832	yes	-1.51095
Clec3b	114.628	1.51948	0.271539	5.59581	2.19597e-08	4.43031e-06	yes	-1.51948
Ppp1r36	109.706	1.52219	0.304714	4.99545	5.86992e-07	6.7367e-05	yes	-1.52219
Ttc21a	432.907	1.53428	0.40574	3.78143	0.000155932	0.00677684	yes	-1.53428
Nxf3	66.2864	1.54414	0.337657	4.57311	4.80544e-06	0.000388612	yes	-1.54414
Htr5b	52.2575	1.5488	0.347731	4.45401	8.42809e-06	0.000635956	yes	-1.5488
Dnajb13	74.0575	1.55482	0.307563	5.05531	4.29689e-07	5.30993e-05	yes	-1.55482
Cfap221	36.0127	1.55509	0.461081	3.3727	0.000744342	0.0229727	yes	-1.55509
Ms4a6c	22.8919	1.55719	0.494048	3.15191	0.00162209	0.0404278	yes	-1.55719
Maats1	193.253	1.55946	0.227093	6.86705	6.55432e-12	3.92563e-09	yes	-1.55946
4930519F16Rik	32.1662	1.56249	0.464352	3.36488	0.000765767	0.0235581	yes	-1.56249
Gm31080	31.2051	1.56784	0.491324	3.19106	0.00141753	0.0368135	yes	-1.56784
Col8a2	232.289	1.57378	0.234049	6.72411	1.76664e-11	9.15119e-09	yes	-1.57378
Mgp	484.177	1.57554	0.463567	3.39874	0.000676963	0.0211659	yes	-1.57554
Ccn2	234.604	1.57592	0.473263	3.32992	0.00086872	0.0255759	yes	-1.57592
Lipg	46.545	1.57643	0.36422	4.32822	1.50318e-05	0.00101443	yes	-1.57643
Fosb	160.355	1.57713	0.310437	5.08035	3.76744e-07	4.71939e-05	yes	-1.57713
Lyz2	229.332	1.57975	0.232618	6.79117	1.11229e-11	5.92171e-09	yes	-1.57975
Mia	103.408	1.58297	0.242466	6.5286	6.63851e-11	2.76595e-08	yes	-1.58297
Gm17455	60.6044	1.58423	0.359337	4.40874	1.03972e-05	0.000757688	yes	-1.58423
Dynlrb2	140.766	1.59216	0.261597	6.0863	1.15553e-09	3.37461e-07	yes	-1.59216
Ccdc170	225.971	1.59285	0.267577	5.95285	2.63508e-09	6.73385e-07	yes	-1.59285
Gm46825	50.1618	1.59658	0.407324	3.91967	8.86696e-05	0.00435809	yes	-1.59658
Corin	72.4511	1.60148	0.294436	5.43913	5.35401e-08	9.32864e-06	yes	-1.60148
Tsnaxip1	62.4839	1.6016	0.413202	3.87606	0.000106161	0.00506905	yes	-1.6016
Gm35611	29.8573	1.60299	0.479229	3.34494	0.000823009	0.0245339	yes	-1.60299
Dcn	657.47	1.60313	0.187813	8.53578	1.39217e-17	1.90588e-14	yes	-1.60313
A730020M07Rik	66.7542	1.60678	0.377803	4.25294	2.10979e-05	0.00132578	yes	-1.60678
Zfp185	73.3169	1.61259	0.338754	4.76036	1.93248e-06	0.000179796	yes	-1.61259
Gm5790	66.4055	1.61298	0.383031	4.21108	2.5415e-05	0.0015713	yes	-1.61298
Slc26a3	23.3471	1.63075	0.506287	3.22099	0.0012775	0.0341486	yes	-1.63075
Akap14	30.4069	1.64717	0.471986	3.48986	0.000483273	0.0164812	yes	-1.64717
Apoc3	75.2888	1.64797	0.408899	4.03026	5.5716e-05	0.00310422	yes	-1.64797
Dnah12	274.81	1.64979	0.452193	3.64842	0.000263863	0.0101144	yes	-1.64979
Serinc2	64.0916	1.67226	0.325689	5.13451	2.82878e-07	3.71345e-05	yes	-1.67226
Crabp2	98.6001	1.6756	0.382649	4.37895	1.19251e-05	0.000846507	yes	-1.6756
Anxa1	146.248	1.69311	0.282475	5.99382	2.04964e-09	5.69325e-07	yes	-1.69311
Tbx3os2	29.6173	1.69508	0.483232	3.5078	0.000451823	0.0156594	yes	-1.69508
Mfap4	31.4323	1.70118	0.481346	3.53421	0.000408998	0.0145265	yes	-1.70118
Ncoa1	3391.25	1.70379	0.0802664	21.2267	5.41504e-100	1.03785e-95	yes	-1.70379
Ak7	419.913	1.70516	0.41175	4.14125	3.45424e-05	0.00206887	yes	-1.70516
Dnali1	232.582	1.71309	0.467166	3.66698	0.000245435	0.00957912	yes	-1.71309
Spag16	154.415	1.71383	0.244104	7.02088	2.20473e-12	1.4571e-09	yes	-1.71383
Slc14a2	89.9698	1.72191	0.335716	5.12907	2.91182e-07	3.79646e-05	yes	-1.72191
Gm10714	53.0182	1.72347	0.397062	4.34056	1.42121e-05	0.000969357	yes	-1.72347
Dnah6	479.093	1.72359	0.475259	3.62664	0.000287137	0.010876	yes	-1.72359
Cfap52	143.841	1.73983	0.273479	6.36185	1.9934e-10	7.34721e-08	yes	-1.73983
Islr	349.713	1.74126	0.511452	3.40454	0.000662753	0.0208235	yes	-1.74126
Ccdc180	183.891	1.74588	0.290446	6.01103	1.8435e-09	5.19595e-07	yes	-1.74588
Wdr49	30.169	1.75473	0.485629	3.61331	0.000302313	0.0113357	yes	-1.75473
2410004P03Rik	332.221	1.76326	0.202015	8.72838	2.58354e-18	4.12635e-15	yes	-1.76326
Spag17	106.905	1.78523	0.312502	5.71269	1.11206e-08	2.56792e-06	yes	-1.78523
BC051019	20.6534	1.78873	0.53777	3.32621	0.000880367	0.0257605	yes	-1.78873
Col23a1	1452.33	1.79126	0.158129	11.3279	9.55153e-30	6.10215e-26	yes	-1.79126
Cyp1b1	102.73	1.82125	0.35236	5.16872	2.35708e-07	3.15914e-05	yes	-1.82125
3300002A11Rik	45.6037	1.82556	0.418614	4.36096	1.29491e-05	0.000889543	yes	-1.82556
Ccdc33	64.5842	1.83071	0.403133	4.5412	5.5936e-06	0.000443004	yes	-1.83071
Ak9	81.465	1.83772	0.336952	5.45396	4.92605e-08	8.82361e-06	yes	-1.83772
Ccdc153	376.195	1.84048	0.523284	3.51716	0.000436189	0.0152834	yes	-1.84048
Sptlc3	29.6372	1.89484	0.480935	3.93992	8.151e-05	0.00411111	yes	-1.89484
Hcar1	33.8984	1.90546	0.523123	3.64246	0.000270041	0.01031	yes	-1.90546
Lbp	228.334	1.91377	0.527879	3.62539	0.000288525	0.0109071	yes	-1.91377
Dthd1	25.65	1.9192	0.546908	3.50919	0.00044948	0.015656	yes	-1.9192
Ldlrad2	26.7518	1.92295	0.526147	3.65477	0.000257412	0.0099467	yes	-1.92295
Lpar3	16.5507	1.93503	0.618608	3.12803	0.00175982	0.0428898	yes	-1.93503
Depp1	35.4379	1.94401	0.481195	4.03996	5.34604e-05	0.00300476	yes	-1.94401
Wdr38	17.6118	1.94661	0.621332	3.13296	0.00173051	0.0423588	yes	-1.94661
C330020E22Rik	28.0926	1.94941	0.557841	3.49457	0.000474829	0.016251	yes	-1.94941
Gm39401	24.5101	1.95013	0.491795	3.96534	7.32923e-05	0.00377613	yes	-1.95013
H2-Ab1	75.5296	1.95373	0.395159	4.94416	7.64722e-07	8.37524e-05	yes	-1.95373
Stmnd1	23.7399	1.96582	0.534019	3.68118	0.000232161	0.00932828	yes	-1.96582
Calml4	84.8523	1.97044	0.354429	5.55948	2.70582e-08	5.23836e-06	yes	-1.97044
Agrp	186.764	2.00342	0.619006	3.23651	0.00121	0.0325257	yes	-2.00342
Cfap77	30.1439	2.00501	0.495123	4.04953	5.13207e-05	0.00291873	yes	-2.00501
Capn11	81.6641	2.00552	0.417139	4.8078	1.52601e-06	0.000146973	yes	-2.00552
Wnt6	38.0561	2.01357	0.580592	3.46812	0.000524104	0.0173343	yes	-2.01357
Cldn9	20.8885	2.01762	0.550103	3.66772	0.000244725	0.00957224	yes	-2.01762
Fam216b	155.255	2.03664	0.633054	3.21717	0.00129463	0.0345103	yes	-2.03664
Lhb	44.6018	2.04049	0.466124	4.37756	1.20013e-05	0.00084877	yes	-2.04049
Gm35908	53.6294	2.0495	0.461275	4.44312	8.86655e-06	0.000662834	yes	-2.0495
Lyg2	22.6516	2.05338	0.558686	3.67538	0.000237492	0.0094045	yes	-2.05338
Ttc29	46.6425	2.06347	0.42757	4.82602	1.39286e-06	0.000136896	yes	-2.06347
Gm8773	27.3126	2.06406	0.562952	3.66649	0.0002459	0.00957912	yes	-2.06406
Nme9	43.0744	2.07544	0.513287	4.04344	5.26727e-05	0.00297795	yes	-2.07544
Zfp474	78.0493	2.099	0.402065	5.22054	1.78399e-07	2.53273e-05	yes	-2.099
H2-Aa	121.081	2.10819	0.584927	3.60419	0.000313124	0.0115856	yes	-2.10819
Gm33050	21.0791	2.11356	0.684096	3.08956	0.00200451	0.0470119	yes	-2.11356
1600029I14Rik	16.7824	2.11845	0.691021	3.06568	0.00217178	0.0499094	yes	-2.11845
Tctex1d4	49.9941	2.13747	0.500414	4.27141	1.9424e-05	0.0012577	yes	-2.13747
Slco1a5	13.0916	2.13984	0.684654	3.12543	0.00177546	0.0430195	yes	-2.13984
Slc43a3	58.9308	2.14007	0.423569	5.05247	4.36136e-07	5.30993e-05	yes	-2.14007
1700024G13Rik	23.8818	2.15093	0.534556	4.02377	5.72729e-05	0.00316338	yes	-2.15093
Prr29	23.9458	2.17202	0.652721	3.32764	0.000875853	0.0257463	yes	-2.17202
Krt80	17.666	2.21469	0.701481	3.15717	0.0015931	0.039913	yes	-2.21469
Tbata	20.6462	2.23014	0.658233	3.38807	0.000703868	0.0217937	yes	-2.23014
Six1	19.1213	2.26128	0.60687	3.72614	0.000194437	0.00810124	yes	-2.26128
Alkal2	31.5354	2.27745	0.534843	4.25817	2.06107e-05	0.00130677	yes	-2.27745
Rax	72.9695	2.31045	0.352694	6.55086	5.72066e-11	2.49187e-08	yes	-2.31045
Unc5cl	34.7867	2.32973	0.535606	4.34971	1.36315e-05	0.000933075	yes	-2.32973
Stoml3	99.6349	2.43184	0.350278	6.9426	3.8496e-12	2.45938e-09	yes	-2.43184
1700019G24Rik	13.8004	2.4706	0.718594	3.4381	0.000585813	0.0188069	yes	-2.4706
Fam180a	39.429	2.4851	0.607414	4.09129	4.28985e-05	0.00248397	yes	-2.4851
Krt8	31.2428	2.58871	0.536307	4.82692	1.38663e-06	0.000136896	yes	-2.58871
Anxa8	64.8274	2.69142	0.459595	5.85607	4.73944e-09	1.16457e-06	yes	-2.69142
Sntn	43.4228	2.81449	0.474427	5.9324	2.98537e-09	7.52862e-07	yes	-2.81449
Ogn	344.427	2.88668	0.878959	3.2842	0.00102272	0.0287832	yes	-2.88668
Gm33543	21.8469	2.99428	0.699341	4.28158	1.85573e-05	0.00120566	yes	-2.99428
Rec8	663.193	3.00125	0.677871	4.42746	9.53488e-06	0.000700174	yes	-3.00125
Gm42318	13.4523	3.02074	0.852939	3.54156	0.000397766	0.0142231	yes	-3.02074
Omd	26.2561	3.19812	0.669648	4.77582	1.78977e-06	0.000168979	yes	-3.19812
Cdh1	122.364	3.32975	0.890748	3.73815	0.000185376	0.0078431	yes	-3.32975
Kcnj13	65.7097	3.33405	1.02355	3.25732	0.00112469	0.0309265	yes	-3.33405
Ces1d	154.482	3.39666	0.301848	11.2529	2.2417e-29	1.07411e-25	yes	-3.39666
Epcam	33.6018	3.5827	0.523273	6.84671	7.55654e-12	4.38875e-09	yes	-3.5827
Cyp2f2	90.6907	3.66522	0.727006	5.04153	4.61819e-07	5.49766e-05	yes	-3.66522
Pitx1	23.2088	3.74422	0.62747	5.96717	2.41408e-09	6.45756e-07	yes	-3.74422
Cga	157.298	5.64965	1.00699	5.61045	2.01805e-08	4.27262e-06	yes	-5.64965
